# Supplementary material for: Coordination-directed self-assembly of molecular motors: towards a two-wheel drive nanocar
Source: Royal Society of Chemistry journal article supplement (doi:10.1039/d1nr05046j), 2021-01-01
Supplement: d1nr05046j1.pdf [file d1nr05046j1.pdf]

Electronic Supplementary Information for Nanoscale

**Coordination-directed self-assembly of molecular motor:  
towards a two-wheel drive nanocar**

Menglian Li,<sup>a</sup> Shaorui Li,<sup>a</sup> Kexin Zhang<sup>d,e</sup>, Xin Chi,<sup>a</sup> Hang Zhou,<sup>a</sup> Hai-Bing Xu,<sup>\*a,b</sup>  
Yuexing Zhang,<sup>a</sup> Quan Li<sup>\*a</sup>, Dong Wang<sup>d,e</sup>, and Ming-Hua Zeng<sup>\*a,c</sup>

*<sup>a</sup> Prof. Dr. Q. Li, Prof. Dr. H. B. Xu, M. Li, S. Li, X. Chi, H. Zhou, Y. Zhang and Prof. Dr. M. H. Zeng*

*Hubei Collaborative Innovation Center for Advanced Organic Chemical Materials, Ministry-of-Education Key Laboratory for the Synthesis and Application of Organic Functional Molecules, College of Chemistry & Chemical Engineering, Hubei University, Wuhan 430062, P. R. China*

*E-mail: xhb@hubu.edu.cn; quanli@hubu.edu.cn*

*<sup>b</sup> Prof. Dr. H. B. Xu*

*State Key Laboratory of Structural Chemistry, Fujian Institute of Research on the Structure of Matter, Chinese Academy of Sciences, Fuzhou, Fujian 350002, P. R. China*

*<sup>c</sup> Prof. Dr. M. H. Zeng*

*Key Laboratory for the Chemistry and Molecular Engineering of Medicinal Resources, School of Chemistry and Pharmaceutical Sciences, Guangxi Normal University, Guilin, 541004, P. R. China*

*E-mail: zmh@mailbox.gxnu.edu.cn*

*<sup>d</sup> K. Zhang and Prof. Dr. D. Wang*

*Key Laboratory of Molecular Nanostructure and Nanotechnology and Beijing National Laboratory for Molecular Sciences, Institute of Chemistry, Chinese Academy of Sciences (CAS), Beijing 100190, P. R. China*

*<sup>e</sup> University of Chinese Academy of Sciences, Beijing 100049, P. R. China*

## Table of Contents

|                                                                                         |    |
|-----------------------------------------------------------------------------------------|----|
| 1. Synthesis .....                                                                      | 1  |
| 2. Literature research.....                                                             | 3  |
| 3. UV-Vis characterization of photochemical and THI Process .....                       | 7  |
| 3.1 The selection of excitation wavelength on <b>L</b> and <b>AgL<sub>2</sub></b> ..... | 7  |
| 3.2 Calculation of quantum yields .....                                                 | 9  |
| 3.3 Kinetic studies of THI process .....                                                | 10 |
| 3.4 Studies on fatigue resistance.....                                                  | 12 |
| 3.5 Disassembly process of “two-wheel nanocar” monitored by UV-Vis spectroscopy .....   | 12 |
| 4 Fluorescence characterization .....                                                   | 13 |
| 5 NMR, ESI-MS and IR characterization .....                                             | 14 |
| 6 Crystal data of <b>L</b> and <b>AgL<sub>2</sub></b> .....                             | 20 |
| 7 DFT calculation.....                                                                  | 22 |
| Reference.....                                                                          | 35 |

## 1. Synthesis

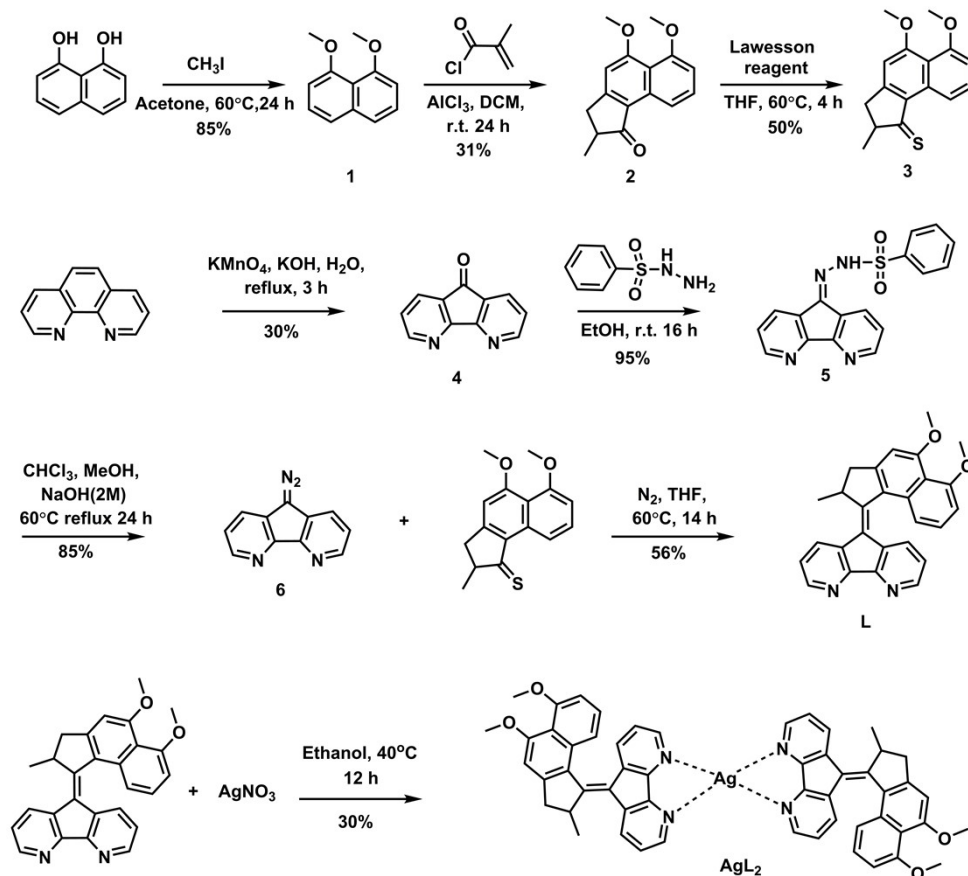

**Scheme S1.** Synthesis of overcrowded alkene-based ligand motor **L** and its silver complex **AgL<sub>2</sub>**.

### Synthetic procedure

#### 1,8-dimethoxynaphthalene (**1**)

1,8-dihydroxynaphthalene (0.8 g, 5 mmol) was dissolved in acetone (20 mL), then  $\text{K}_2\text{CO}_3$  (3.46 g, 25 mmol) and methyl iodide (1.56 mL, 25 mmol) was added to the solution sequentially. The reaction mixture was refluxed for 24 h. The progress of the reaction was monitored by thin-layer chromatography. At the end of the reaction, the solution was acidified with dilute HCl (2 M, 20 mL) and extracted with  $\text{CH}_2\text{Cl}_2$  ( $3 \times 20$  mL). The combined organic phases were washed with water and saturated NaCl, then dried over  $\text{MgSO}_4$ , and concentrated under vacuum. Finally, the pure product was obtained through further silica gel column chromatography (petroleum ether: ethyl acetate = 9:1). (light grey solid, 0.8 g, 85%).  $^1\text{H}$  NMR (400 MHz,  $\text{CDCl}_3$ )  $\delta$  7.42-7.34 (m, 4H), 6.86 (dd,  $J = 7.7, 3.9$  Hz, 2H), 3.98 (s, 6H) ppm. ESI-MS ( $\text{CH}_3\text{OH}$ ,  $m/z$ ): 189.0899 ( $[\text{M} + \text{H}]^+$ , calcd for  $[\text{C}_{12}\text{H}_{13}\text{O}_2]^+$ : 189.0916).

#### 5,6-dimethoxy-2-methyl-2,3-dihydro-1H-cyclopenta[a]naphthalen-1-one (**2**)

A mixture of  $\text{AlCl}_3$  (1.33 g, 10 mmol) and methacryloyl chloride (0.48 mL, 5 mmol) in

degassed  $\text{CH}_2\text{Cl}_2$  (25 mL) was cooled down to  $-78\text{ }^\circ\text{C}$ , solid complex **1** (0.94 g, 5mmol) was poured into the mixture portion wise over 10 minutes, then the mixture was allowed to attain room temperature overnight. After the reaction completed, the solution was poured into a mixture of 25 mL ice water and 12.5 mL HCl (1 M), continue stirring for 4 h, the resulting mixture was extracted with diethyl (3  $\times$  25 mL), the combined organic layer was washed with brine (20 mL), dried over  $\text{MgSO}_4$ , and the crude product was purified by silica gel column chromatography (petroleum ether: ethyl acetate = 9:1) to give the corresponding product (yellow solid, 0.4 g, 31%). ESI-MS ( $\text{CH}_3\text{OH}$ ,  $m/z$ ): 257.1150 ( $[\text{M} + \text{H}]^+$ , calcd for  $[\text{C}_{16}\text{H}_{17}\text{O}_3]^+$ : 257.1172), 535.2048 ( $[2\text{M} + \text{Na}]^+$ , calcd for  $[\text{C}_{32}\text{H}_{32}\text{NaO}_6]^+$ : 535.2097).

### **5,6-dimethoxy-2-methyl-2,3-dihydro-1H-cyclopenta[a]naphthalene-1-thione (3)**

Compound **2** (160 mg, 0.62 mmol) was dissolved in dry THF (10 mL), then Lawesson Reagent (506 mg, 1.25 mmol) was added to the solution, the mixture stirred for 4 h at  $60\text{ }^\circ\text{C}$ , after that the solvent was removed in vacuum, and the crude product was purified by silica gel column chromatography (petroleum ether: ethyl acetate = 10:1) to give the corresponding product (orange powder, 85 mg, 50%).  $^1\text{H}$  NMR (400 MHz,  $\text{CDCl}_3$ )  $\delta$  10.01 (m, 1H), 7.64 (t,  $J=10.4$  Hz, 1H), 7.00 (d,  $J=7.1$  Hz, 1H), 6.82 (s, 1H), 4.08 (s, 3H), 3.97 (s, 3H), 3.49-3.37 (m, 1H), 3.14 (m, 1H), 2.91-2.78 (m, 1H), 1.48 (d,  $J=8.0$  Hz, 3H). ESI-MS ( $\text{CH}_3\text{OH}$ ,  $m/z$ ): 273.0940( $[\text{M} + \text{H}]^+$ , calcd for  $[\text{C}_{16}\text{H}_{17}\text{O}_2\text{S}]^+$ : 273.0949).

Compounds **4-6** were prepared according to literature procedures. <sup>S1</sup>

### **5-(5,6-dimethoxy-2-methyl-2,3-dihydro-1H-cyclopenta[a]naphthalen-1-ylidene)-5H-cyclopenta[2,1-b:3,4-b']dipyridine. (( $\pm$ )-L)**

Freshly prepared **3** (250 mg, 1.28 mmol) and compound **6** (200 mg, 0.7 mmol) in THF (20 mL) were heated at reflux for 14 h under a  $\text{N}_2$  atmosphere. The solution was naturally cooled to room temperature, followed by concentration, and the crude product was purified by silica gel column chromatography (petroleum ether : ethyl acetate = 10:1, followed by EA:DCM=4:1 ) to give the corresponding product (yellow solid, 160 mg, 56%).  $^1\text{H}$  NMR (400 MHz,  $\text{CD}_2\text{Cl}_2$ )  $\delta$  8.67 (d,  $J=4.5$  Hz, 1H), 8.52 (d,  $J=4.4$  Hz, 1H), 8.30 (d,  $J=7.7$  Hz, 1H), 7.41 (dd,  $J=7.5, 4.8$  Hz, 1H), 7.21 (m, 2H), 7.00 (s, 1H), 6.96-6.84 (m, 3H), 4.24 (m, 1H), 4.06 (s, 3H), 3.99 (s, 3H), 3.56 (dd,  $J=15.4, 5.7$  Hz, 1H), 2.79 (d,  $J=16.2$  Hz, 1H), 1.42 (d,  $J=7.7$  Hz, 3H).  $^{13}\text{C}$  NMR (100 MHz,  $\text{CD}_2\text{Cl}_2$ )  $\delta$  161.22, 158.34, 156.85, 155.91, 155.45, 150.90, 147.66, 147.45, 134.44, 133.17, 132.66, 131.90, 130.66, 128.10, 127.34, 122.56, 121.37, 121.23, 119.43, 116.31, 106.33, 103.77, 56.28, 56.24, 44.57, 41.79, 19.65. ESI-MS ( $\text{CH}_3\text{OH}$ ,  $m/z$ ) 407.1737 ( $[\text{L} + \text{H}]^+$ , calcd for  $[\text{C}_{27}\text{H}_{23}\text{N}_2\text{O}_2]^+$ : 407.1760), 835.3233 ( $[2\text{L} + \text{Na}]^+$ , calcd for  $[\text{C}_{54}\text{H}_{44}\text{N}_4\text{O}_4\text{Na}]^+$ : 835.3260).

## 2. Literature research

**Table S1.** Strategies of regulating the excitation wavelength of 2<sup>nd</sup> generation molecular motors

| Approaches                         | Structure                                                                           | $\lambda_{\text{ex}}$ (solvent) | Literature                                                                                                             |
|------------------------------------|-------------------------------------------------------------------------------------|---------------------------------|------------------------------------------------------------------------------------------------------------------------|
| Extension of $\pi$ -system         | 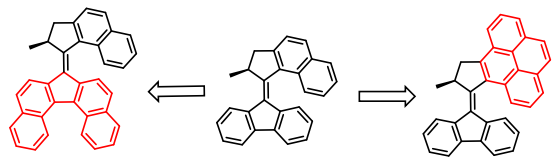  | 490 nm<br>(DCM)                 | <i>Org. Lett.</i> <b>2017</b> , <i>19</i> , 1402-1405;<br><i>Helv. Chim. Acta.</i> <b>2019</b> , <i>102</i> , e1800221 |
| Construction of “push-pull” system |   | 530 nm<br>(DCM)                 | <i>Chem. Sci.</i> <b>2019</b> , <i>10</i> , 8768-8773                                                                  |
| Triplet-triplet sensitization      |   | 532 nm<br>(1,2-dichloroethane)  | <i>J. Am. Chem. Soc.</i> <b>2012</b> , <i>134</i> , 17613-17619                                                        |
| Coordinate with Ru(II)             |  | 450 nm<br>(DCM)                 | <i>Angew. Chem. Int. Ed.</i> <b>2015</b> , <i>127</i> , 11619-11623.                                                   |

**Table S2.** Approaches of modulating rotate speed of 2<sup>nd</sup> generation molecular motors

| Approaches                                              | Structure                                                                                                                                                                                                                                                                                                                                                                                                                                                                                                                            | $t_{1/2}$ for THI                                                                                                       | Literature                                                                                               |                                                                                    |                                                                                                                                                        |                                                          |                                                                                     |                                                                        |                                                               |                                                                                     |                                                                       |                                                  |                                  |   |                 |   |   |                 |                                  |                                                                                                                       |                                                             |
|---------------------------------------------------------|--------------------------------------------------------------------------------------------------------------------------------------------------------------------------------------------------------------------------------------------------------------------------------------------------------------------------------------------------------------------------------------------------------------------------------------------------------------------------------------------------------------------------------------|-------------------------------------------------------------------------------------------------------------------------|----------------------------------------------------------------------------------------------------------|------------------------------------------------------------------------------------|--------------------------------------------------------------------------------------------------------------------------------------------------------|----------------------------------------------------------|-------------------------------------------------------------------------------------|------------------------------------------------------------------------|---------------------------------------------------------------|-------------------------------------------------------------------------------------|-----------------------------------------------------------------------|--------------------------------------------------|----------------------------------|---|-----------------|---|---|-----------------|----------------------------------|-----------------------------------------------------------------------------------------------------------------------|-------------------------------------------------------------|
| Exchanging the size of bridging atoms                   | 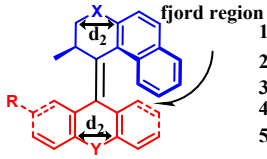 <table border="1" data-bbox="742 324 925 481"> <thead> <tr> <th></th> <th>X</th> <th>Y</th> </tr> </thead> <tbody> <tr> <td>1</td> <td>S</td> <td>S</td> </tr> <tr> <td>2</td> <td>S</td> <td>O</td> </tr> <tr> <td>3</td> <td>S</td> <td>C(CH<sub>3</sub>)<sub>2</sub></td> </tr> <tr> <td>4</td> <td>CH<sub>2</sub></td> <td>S</td> </tr> <tr> <td>5</td> <td>CH<sub>2</sub></td> <td>C(CH<sub>3</sub>)<sub>2</sub></td> </tr> </tbody> </table> |                                                                                                                         | X                                                                                                        | Y                                                                                  | 1                                                                                                                                                      | S                                                        | S                                                                                   | 2                                                                      | S                                                             | O                                                                                   | 3                                                                     | S                                                | C(CH <sub>3</sub> ) <sub>2</sub> | 4 | CH <sub>2</sub> | S | 5 | CH <sub>2</sub> | C(CH <sub>3</sub> ) <sub>2</sub> | <p><b>1:</b> 215 h</p> <p><b>2:</b> 26.3 h</p> <p><b>3:</b> 233 h</p> <p><b>4:</b> 0.67 h</p> <p><b>5:</b> 2.01 h</p> | <p><i>J. Am. Chem. Soc.</i> <b>2002</b>, 124, 5037-5051</p> |
|                                                         |                                                                                                                                                                                                                                                                                                                                                                                                                                                                                                                                      |                                                                                                                         | X                                                                                                        | Y                                                                                  |                                                                                                                                                        |                                                          |                                                                                     |                                                                        |                                                               |                                                                                     |                                                                       |                                                  |                                  |   |                 |   |   |                 |                                  |                                                                                                                       |                                                             |
|                                                         |                                                                                                                                                                                                                                                                                                                                                                                                                                                                                                                                      | 1                                                                                                                       | S                                                                                                        | S                                                                                  |                                                                                                                                                        |                                                          |                                                                                     |                                                                        |                                                               |                                                                                     |                                                                       |                                                  |                                  |   |                 |   |   |                 |                                  |                                                                                                                       |                                                             |
|                                                         |                                                                                                                                                                                                                                                                                                                                                                                                                                                                                                                                      | 2                                                                                                                       | S                                                                                                        | O                                                                                  |                                                                                                                                                        |                                                          |                                                                                     |                                                                        |                                                               |                                                                                     |                                                                       |                                                  |                                  |   |                 |   |   |                 |                                  |                                                                                                                       |                                                             |
|                                                         |                                                                                                                                                                                                                                                                                                                                                                                                                                                                                                                                      | 3                                                                                                                       | S                                                                                                        | C(CH <sub>3</sub> ) <sub>2</sub>                                                   |                                                                                                                                                        |                                                          |                                                                                     |                                                                        |                                                               |                                                                                     |                                                                       |                                                  |                                  |   |                 |   |   |                 |                                  |                                                                                                                       |                                                             |
| 4                                                       | CH <sub>2</sub>                                                                                                                                                                                                                                                                                                                                                                                                                                                                                                                      | S                                                                                                                       |                                                                                                          |                                                                                    |                                                                                                                                                        |                                                          |                                                                                     |                                                                        |                                                               |                                                                                     |                                                                       |                                                  |                                  |   |                 |   |   |                 |                                  |                                                                                                                       |                                                             |
| 5                                                       | CH <sub>2</sub>                                                                                                                                                                                                                                                                                                                                                                                                                                                                                                                      | C(CH <sub>3</sub> ) <sub>2</sub>                                                                                        |                                                                                                          |                                                                                    |                                                                                                                                                        |                                                          |                                                                                     |                                                                        |                                                               |                                                                                     |                                                                       |                                                  |                                  |   |                 |   |   |                 |                                  |                                                                                                                       |                                                             |
| Introducing bulky substituent at the stereogenic center |                                                                                                                                                                                                                                                                                                                                                                                                                                                     | <p><b>6:</b> 190 s</p> <p><b>7:</b> 587 s</p> <p><b>8:</b> 95 s</p> <p><b>9:</b> <math>5.74 \times 10^{-3}</math> s</p> | <p><i>J. Am. Chem. Soc.</i> <b>2006</b>, 128, 5127-5135</p>                                              |                                                                                    |                                                                                                                                                        |                                                          |                                                                                     |                                                                        |                                                               |                                                                                     |                                                                       |                                                  |                                  |   |                 |   |   |                 |                                  |                                                                                                                       |                                                             |
|                                                         |                                                                                                                                                                                                                                                                                                                                                                                                                                                                                                                                      | Contraction of the ring                                                                                                 |                                                                                                          |  | <p><b>10:</b> 1400 year</p> <p><b>11:</b> 3.2 min</p> <p><b>12:</b> 15 s</p> <p><b>13:</b> 70 ms</p> <p><b>14:</b> <math>1.1 \times 10^2</math> ns</p> | <p><i>Chem. Soc. Rev.</i> <b>2017</b>, 46, 2592-2621</p> |                                                                                     |                                                                        |                                                               |                                                                                     |                                                                       |                                                  |                                  |   |                 |   |   |                 |                                  |                                                                                                                       |                                                             |
|                                                         |                                                                                                                                                                                                                                                                                                                                                                                                                                                                                                                                      |                                                                                                                         |                                                                                                          |                                                                                    | Using the principles of allosteric effect                                                                                                              |                                                          |  | <p><b>15:</b> 38 s</p> <p><b>16:</b> 9.8 s</p> <p><b>17:</b> 2.7 s</p> | <p><i>J. Am. Chem. Soc.</i> <b>2016</b>, 138, 13597-13603</p> |                                                                                     |                                                                       |                                                  |                                  |   |                 |   |   |                 |                                  |                                                                                                                       |                                                             |
|                                                         |                                                                                                                                                                                                                                                                                                                                                                                                                                                                                                                                      |                                                                                                                         |                                                                                                          |                                                                                    |                                                                                                                                                        |                                                          |                                                                                     | Through covalent and noncovalent binding.                              |                                                               |  | <p><b>18:</b> <math>5 \times 10^3</math> s</p> <p><b>19:</b> 30 s</p> | <p><i>Chem. Eur. J.</i> <b>2017</b>, 23, 1-5</p> |                                  |   |                 |   |   |                 |                                  |                                                                                                                       |                                                             |
| Through host-guest non-covalent interaction             |                                                                                                                                                                                                                                                                                                                                                                                                                                                   |                                                                                                                         | <p><b>20:</b> 12.4 min</p> <p><b>21:</b> 7.6 min</p> <p><b>22:</b> 9.1 min</p> <p><b>23:</b> 7.1 min</p> |                                                                                    |                                                                                                                                                        |                                                          |                                                                                     |                                                                        |                                                               |                                                                                     | <p><i>Org. Lett.</i> <b>2018</b>, 20, 3715-3718</p>                   |                                                  |                                  |   |                 |   |   |                 |                                  |                                                                                                                       |                                                             |

**Table S3.** Representative artificial “four-wheels nanocar”

| Category                                                 | Structure                                                                           | Literature                                                  |
|----------------------------------------------------------|-------------------------------------------------------------------------------------|-------------------------------------------------------------|
|                                                          | 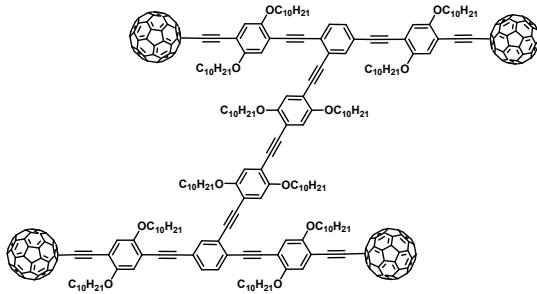  | <i>Nano Lett.</i> , <b>2005</b> , <i>5</i> , 2330-2334.     |
| Nanocar without motor                                    |   | <i>Acc. Chem. Res.</i> , <b>2009</b> , <i>42</i> , 473-487. |
|                                                          |  | <i>ACS Nano.</i> , <b>2013</b> , <i>7</i> , 35-41           |
| Motorized nanocar with <i>p</i> -carborane as the wheels |  | <i>ACS Nano.</i> , <b>2012</b> , <i>6</i> , 592-597.        |

---

Fluorescent  
motorized nanocar

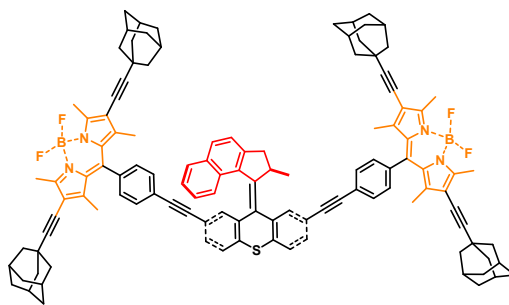

*Asian. J. Org. Chem.*  
**2015**, 4, 1308-1314

---

Motorized nanocar  
which can translate  
on a Cu(111)  
surface upon light  
activation

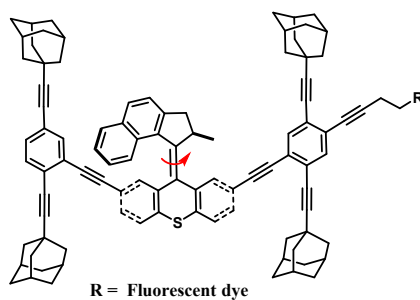

*Tetrahedron*, **2017**, 73,  
4864-4873.

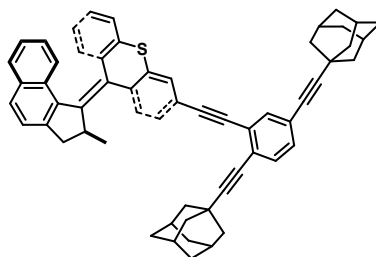

*ACS Nano*, **2016**, 10,  
10945-10952.

---

Motorized nanocar  
which can move  
directionally across  
Cu(111) surface  
after electronic  
excitation

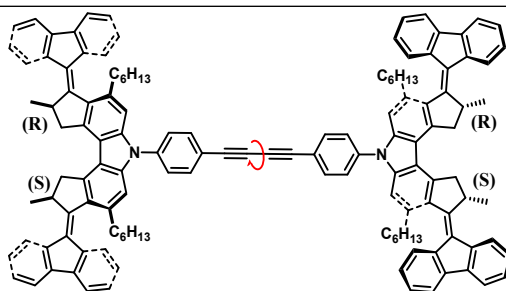

*Nature*, **2011**, 479,  
208-201.



### 3. UV-Vis characterization of photochemical and THI Process

#### 3.1 The selection of excitation wavelength on **L** and **AgL<sub>2</sub>**

A xenon lamp light source (Perfect light, PLS-SXE300) which was equipped with different optical filters (365 nm to 700 nm) and power meter (PLS-MW2000) was used for photoisomerization studies and measuring the radiant power of the incident excitation beams at the excitation wavelength. The radiant power was obtained in mW, then the value was transformed into photo intensity (*I*), which was obtained in mW/cm<sup>2</sup> and was further used for quantum yield calculation.

To select a suitable wavelength that can excite the sample **L** and **AgL<sub>2</sub>**, we conducted selection experiments of **L** and **AgL<sub>2</sub>** in dry DCM solution ( $4 \times 10^{-5}$  M) under different excitation wavelength. The solution of **L** and **AgL<sub>2</sub>** was exposed to different light source (365 nm to 450 nm for **L**; 450-500 nm for **AgL<sub>2</sub>**), then utilized the UV-VIS-NIR spectrophotometer to monitor the changes of UV-Vis spectrum upon irradiation (Figure S1).

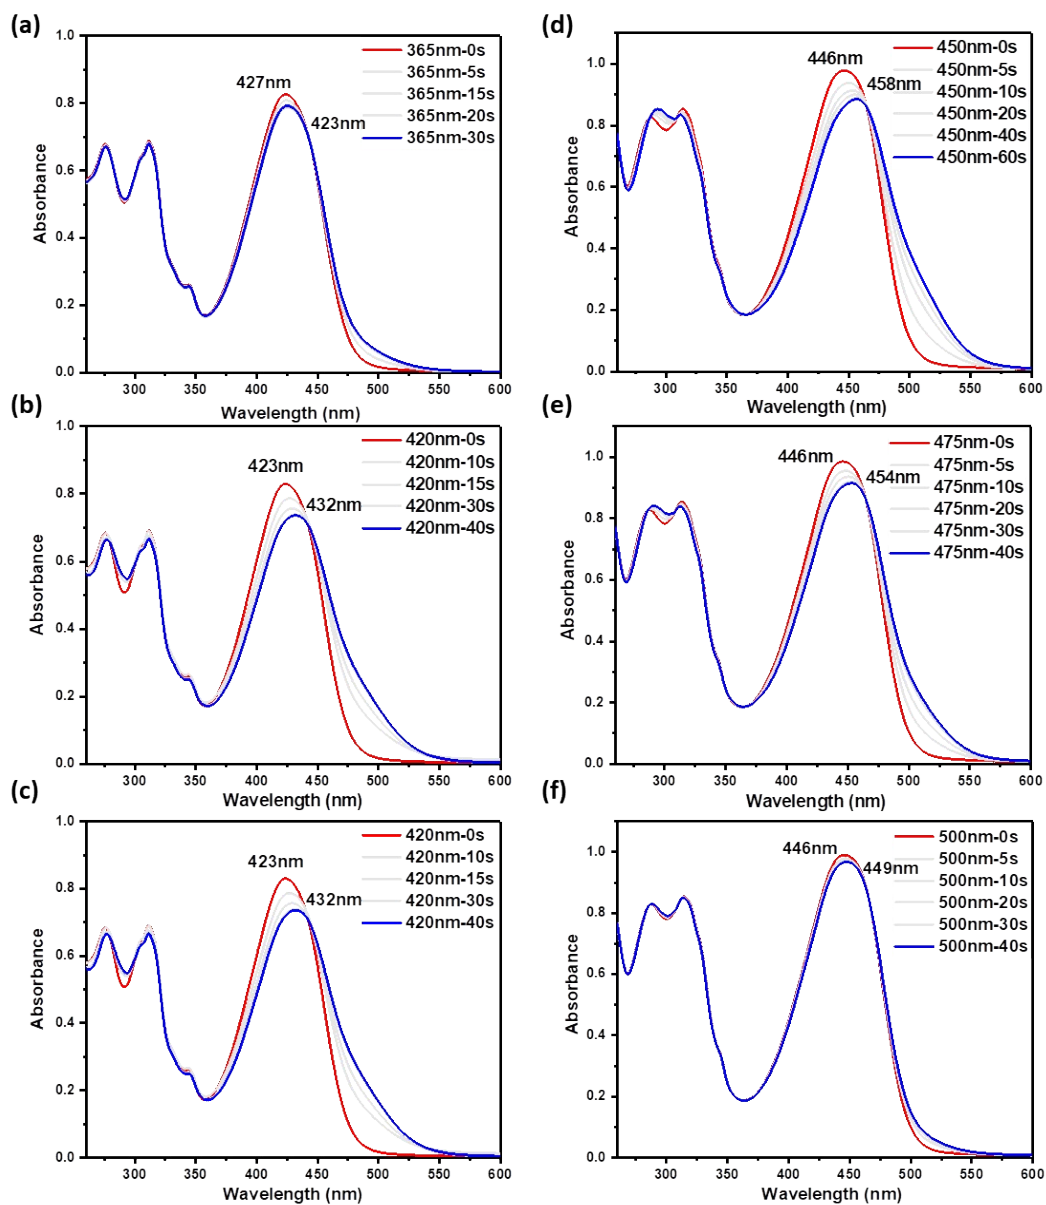

**Figure S1.** UV-Vis spectrum of photoisomerization process of **L** (a-c) and **AgL<sub>2</sub>** (d-f) in dry DCM ( $4 \times 10^{-5}$  M) under different excitation wavelength (a-f: 365 nm, 420 nm, 450 nm, 475 nm, 500 nm).

### 3.2 Calculation of quantum yields

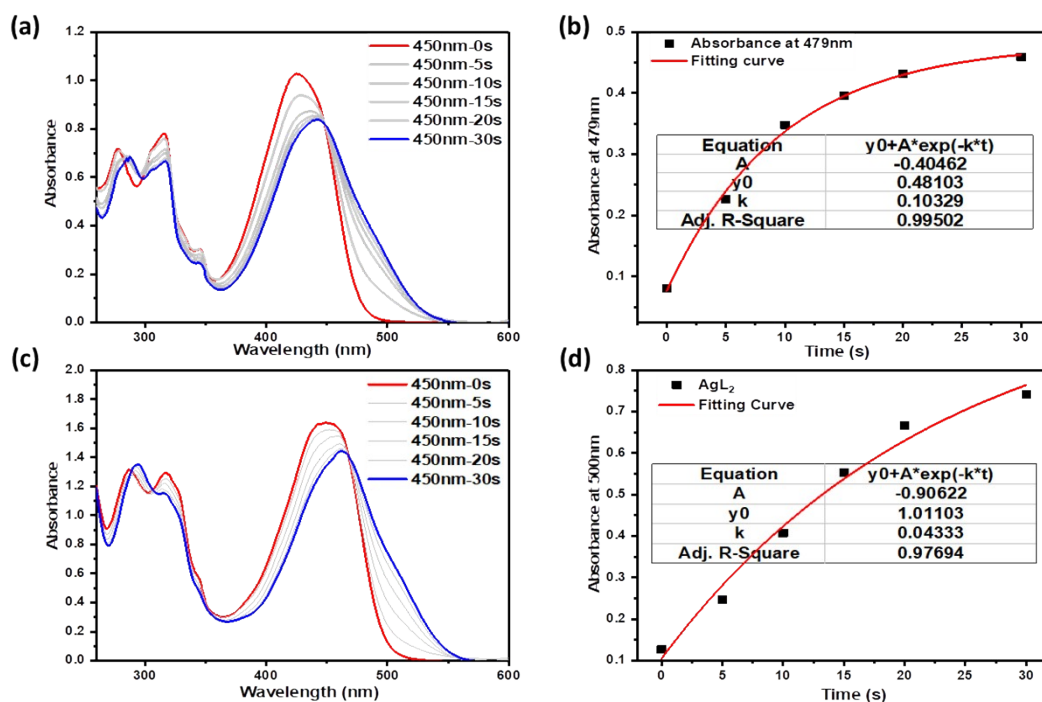

**Figure S2.** Kinetics for the photoisomerization (irradiation at 450 nm) of **L** and **AgL<sub>2</sub>** in dry DCM ( $4 \times 10^{-5}$  M) at 250 K. The plot figure b and d is of the absorbance changes of **L** (at 479 nm) and **AgL<sub>2</sub>** (at 500 nm) as a function of time. The photoisomerization rate constant  $k_{\text{stable-unstable}}$  was used for quantum yield calculations.

The quantum yields of photo-isomerization reactions was measured following the reported literature.<sup>S2</sup> Firstly, the solution of **L** and **AgL<sub>2</sub>** in DCM ( $4 \times 10^{-5}$  M) were prepared to monitor UV-Vis absorption spectrum under irradiation of 450 nm at 250 K through Agilent Cary 6000i UV-VIS-NIR spectrophotometer (Figure S2 (a) and (c)). For ligand **L**, it was exposed to xenon lamp light source equipped with 450 nm filter, monitored the absorbance changes against irradiation time; then the maximum of absorbance difference (**L** at 479 nm, **AgL<sub>2</sub>** at 500 nm) was monitored and plotted against time affording the photo-dynamic profile of light-induced stable motor to unstable one (Figure S2 (b) and (d)). After that, the experimental curve is fitted to the monoexponential function ( $Y = Y_0 + A \times \exp(-k \times t)$ ) so as to obtain the rate constant ( $k_{\text{stable-unst}}$ ) of photo-isomerization process. Then the rate constant was employed to calculate the quantum yield according to the following equations 1-4. Among which,  $\sigma_{\text{ex}}$  ( $\text{cm}^2/\text{molecule}$ ) is the absorption cross-section at excitation wavelength  $\lambda_{\text{ex}}$  (nm).  $\Psi_{\text{ex}}$  is the photon flux.  $I$  ( $\text{W}/\text{cm}^2$ ) is the optical intensity of irradiation light performed on the sample,  $N_a$  is the Avogadro's constant, and  $\kappa_{\text{ex}}$  is the rate constant for absorption at excitation wavelength. The relative optical parameters are listed in Table S4; From these values and equations 1-4, the quantum yield ( $\Phi_{\text{stable-unstable}}$ ) of photochemical process was obtained.

$$\sigma_{\text{ex}}=(10^3 \times \ln(10/N_a)) \times \epsilon_{\text{ex}} \quad (1)$$

$$\Psi_{\text{ex}}=5 \times 10^{15} \times \lambda_{\text{ex}} \times I \quad (2)$$

$$\kappa_{\text{ex}}=\sigma_{\text{ex}} \times \Psi_{\text{ex}} \quad (3)$$

$$\Phi_{\text{stable-unstable}}=k_{\text{stable-unstable}}/\kappa_{\text{ex}} \quad (4)$$

**Table S4. Relative optical parameters for calculating the quantum yields**

| Complexes              | $\lambda_{\text{ex}}$<br>(nm) | $\epsilon_{\text{ex}}$<br>(L/(mol*cm)) | I<br>(mW/cm <sup>2</sup> ) | $\Psi_{\text{ex}}$<br>(/10 <sup>16</sup> ) | $\sigma_{\text{ex}}$<br>( $\times 10^{17}$ ) | $k_{\text{stable-unstable}}$ | $k_{\text{ex}}$ | $\Phi$<br>(stable-unstable)<br>(%) |
|------------------------|-------------------------------|----------------------------------------|----------------------------|--------------------------------------------|----------------------------------------------|------------------------------|-----------------|------------------------------------|
| <b>L</b>               | 450                           | 20213                                  | 39                         | 8.79                                       | 7.73                                         | 0.103                        | 6.8             | 1.5                                |
| <b>AgL<sub>2</sub></b> |                               | 33663                                  |                            |                                            | 1.29                                         | 0.0433                       | 11.32           | 0.38                               |

### 3.3 Kinetic Studies of THI process

Since the thermal half-lives of **L** and **AgL<sub>2</sub>** for THI process is very short at room temperature, the kinetics of this process were studied at 265 K and monitored through Agilent Cary 6000i UV-VIS-NIR spectrophotometer. They were dissolved in dry DCM ( $4 \times 10^{-5}$  M) and irradiated to PSS with 450nm light source, the light source was removed and the sample was remained at 265 K under darkness, meanwhile the absorbance changes against time was recorded (Figure S3a and S3c).

Changes in the absorbance at 476nm for **L** and 500nm for **AgL<sub>2</sub>** were monitored to afford decay profile of THI process (Figure S3b and S3d). The rate constant ( $k_1$ ) of the first order decay at 265 K was determined by fitting the decay curve to the equation  $Y=Y_0+A \times \exp(-k/t)$  using Origin software.

The value of  $k_1$  (265 K) was measured and then used to calculate the energy barriers for the thermal helix inversion process using the Eyring equation (Eq. 5.). With the energy barriers ( $\Delta G^\ddagger$ ) in hand, the Arrhenius equation (Eq. 6) was used to extrapolate the rate constants ( $k_2$ ) at 293 K, from which the room-temperature thermal half-lives were determined<sup>S3</sup>. The relative parameter refers to calculate the  $\Delta G^\ddagger$  (293 K) are listed in Table S5.

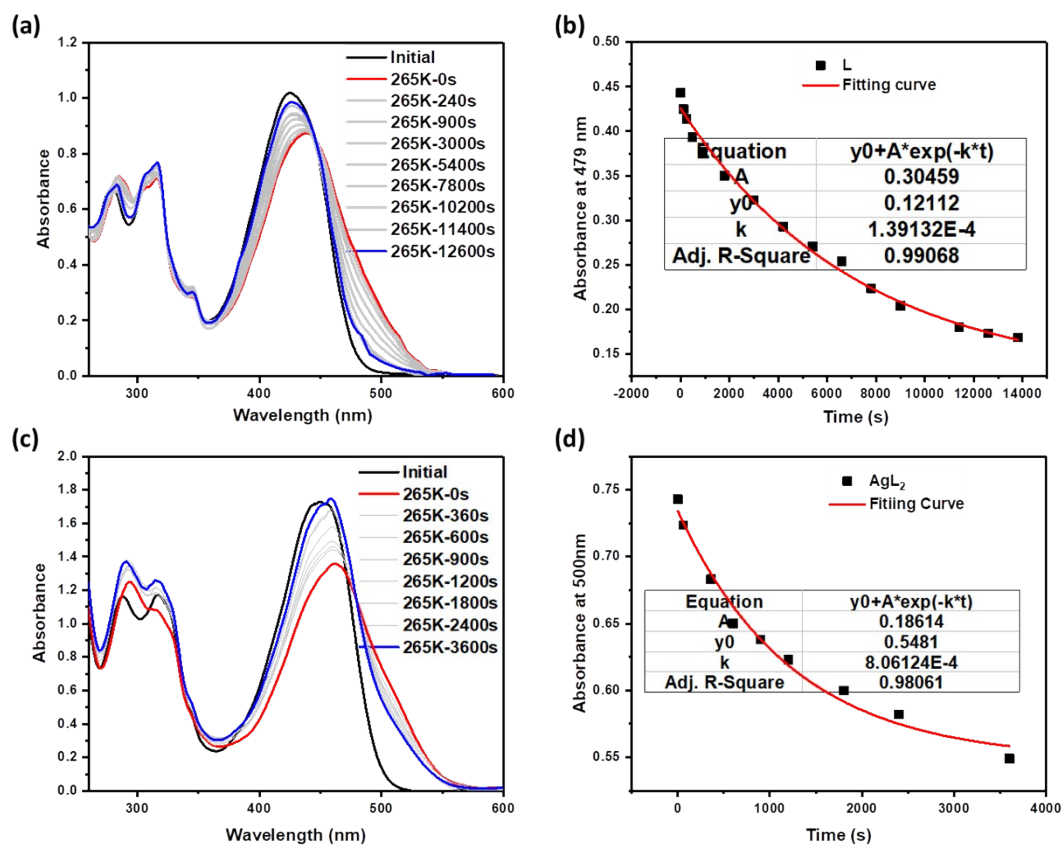

**Figure S3.** Thermal helix inversion of **L** and **AgL<sub>2</sub>** in dry DCM at 265 K. The plot is of the absorbance changes of **L** (at 476 nm) and **AgL<sub>2</sub>** (at 500 nm) as a function of time. The resulting  $k_1$  value was calculated through fitted with monoexponential functions  $Y=Y_0+A \times \exp(-k_1 t)$ .

$$\Delta G^\ddagger = 8.314 \times T \times [23.760 + \ln(T/K)] \quad (5)$$

$$\ln(k_2/k_1) = \Delta G^\ddagger / R \times [(1/T_1) - (1/T_2)] \quad (6)$$

**Table S5.** The kinetic parameters of **L** and **AgL<sub>2</sub>** for THI process

| Complex                | T <sub>1</sub> (K) | T <sub>2</sub> (K) | k <sub>1</sub> (265K) | $\Delta G^\ddagger$ (kJ/mol) | k <sub>2</sub> (293K) | t <sub>1/2</sub> (293K) |
|------------------------|--------------------|--------------------|-----------------------|------------------------------|-----------------------|-------------------------|
|                        |                    |                    | s <sup>-1</sup>       |                              | s <sup>-1</sup>       | (s)                     |
| <b>L</b>               | 265                | 293                | 0.00014               | 84                           | 0.0053                | 130.3                   |
| <b>AgL<sub>2</sub></b> | 265                | 293                | 0.000806              | 80.1                         | 0.0260                | 26.6                    |

### 3.4 Studies on fatigue resistance

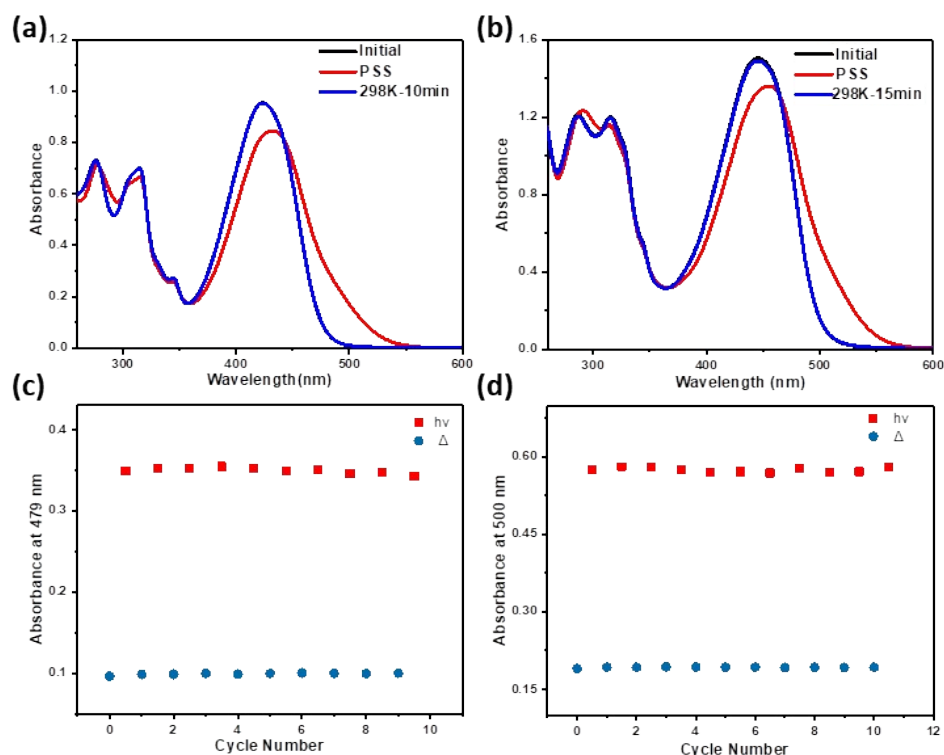

**Figure S4.** Isomerization behavior of (a) **L**; (b) **AgL<sub>2</sub>** at 298 K and fatigue-resistance studies of (c) **L** and (d) **AgL<sub>2</sub>**. The absorbance change at 479 nm and 500 nm was monitored for **L** and **AgL<sub>2</sub>**, respectively.

### 3.5 Disassembly process of “two-wheel nanocar” monitored by UV-Vis spectroscopy

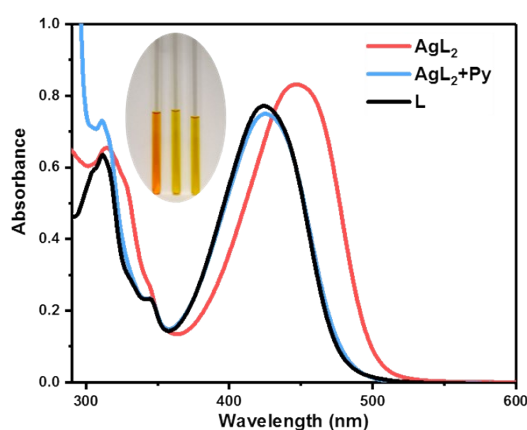

**Figure S5.** Disassembly process of **AgL<sub>2</sub>** monitored through UV-Vis spectroscopy. Spectra of **AgL<sub>2</sub>** ( $2 \times 10^{-5}$  M) in DCM solution (pink line); after addition of pyridine (**AgL<sub>2</sub>+Py**) (blue line) and **L** ( $2 \times 10^{-5}$  M) in DCM solution (black line). Insert: The color of **AgL<sub>2</sub>**, after addition of pyridine (**AgL<sub>2</sub>-Py**), **L**. (from left to right)

## 4 Fluorescence characterization

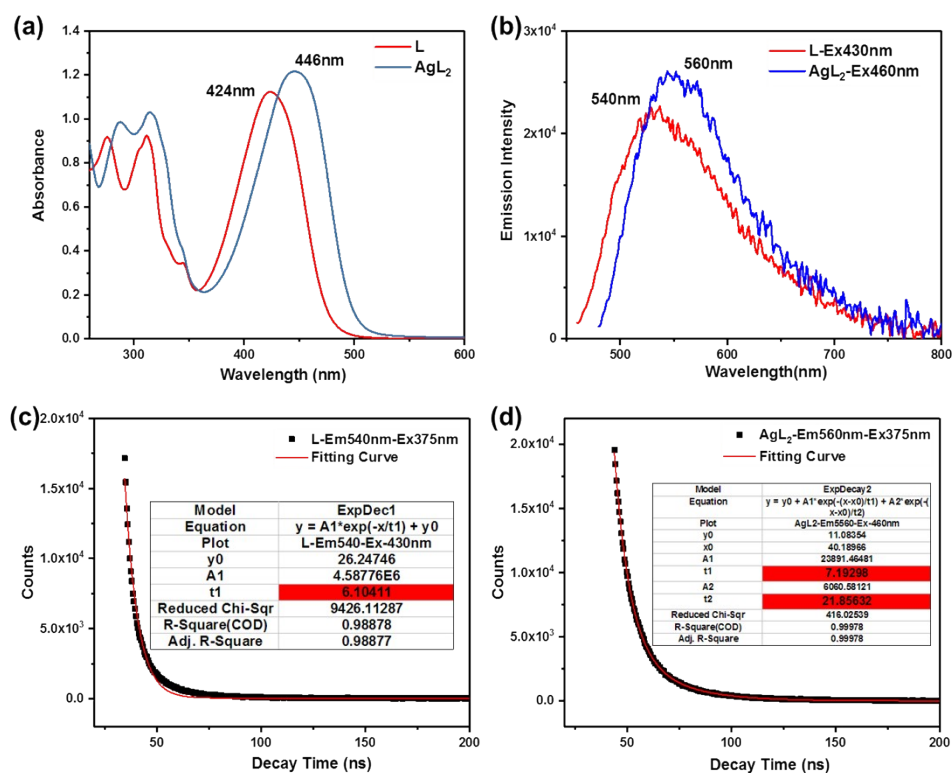

**Figure S6.** Spectrum of L and AgL<sub>2</sub> measured in DCM ( $4 \times 10^{-5}$  M) solution at 200 K. (a) UV-Vis absorption spectrum; (b) Emission spectrum ( $\lambda_{\text{ex}}=430$  nm and 460 nm); Emission decay behaviors of (c) L and (d) AgL<sub>2</sub> (under excitation of 375 nm laser).

## 5 NMR, ESI-MS and IR characterization

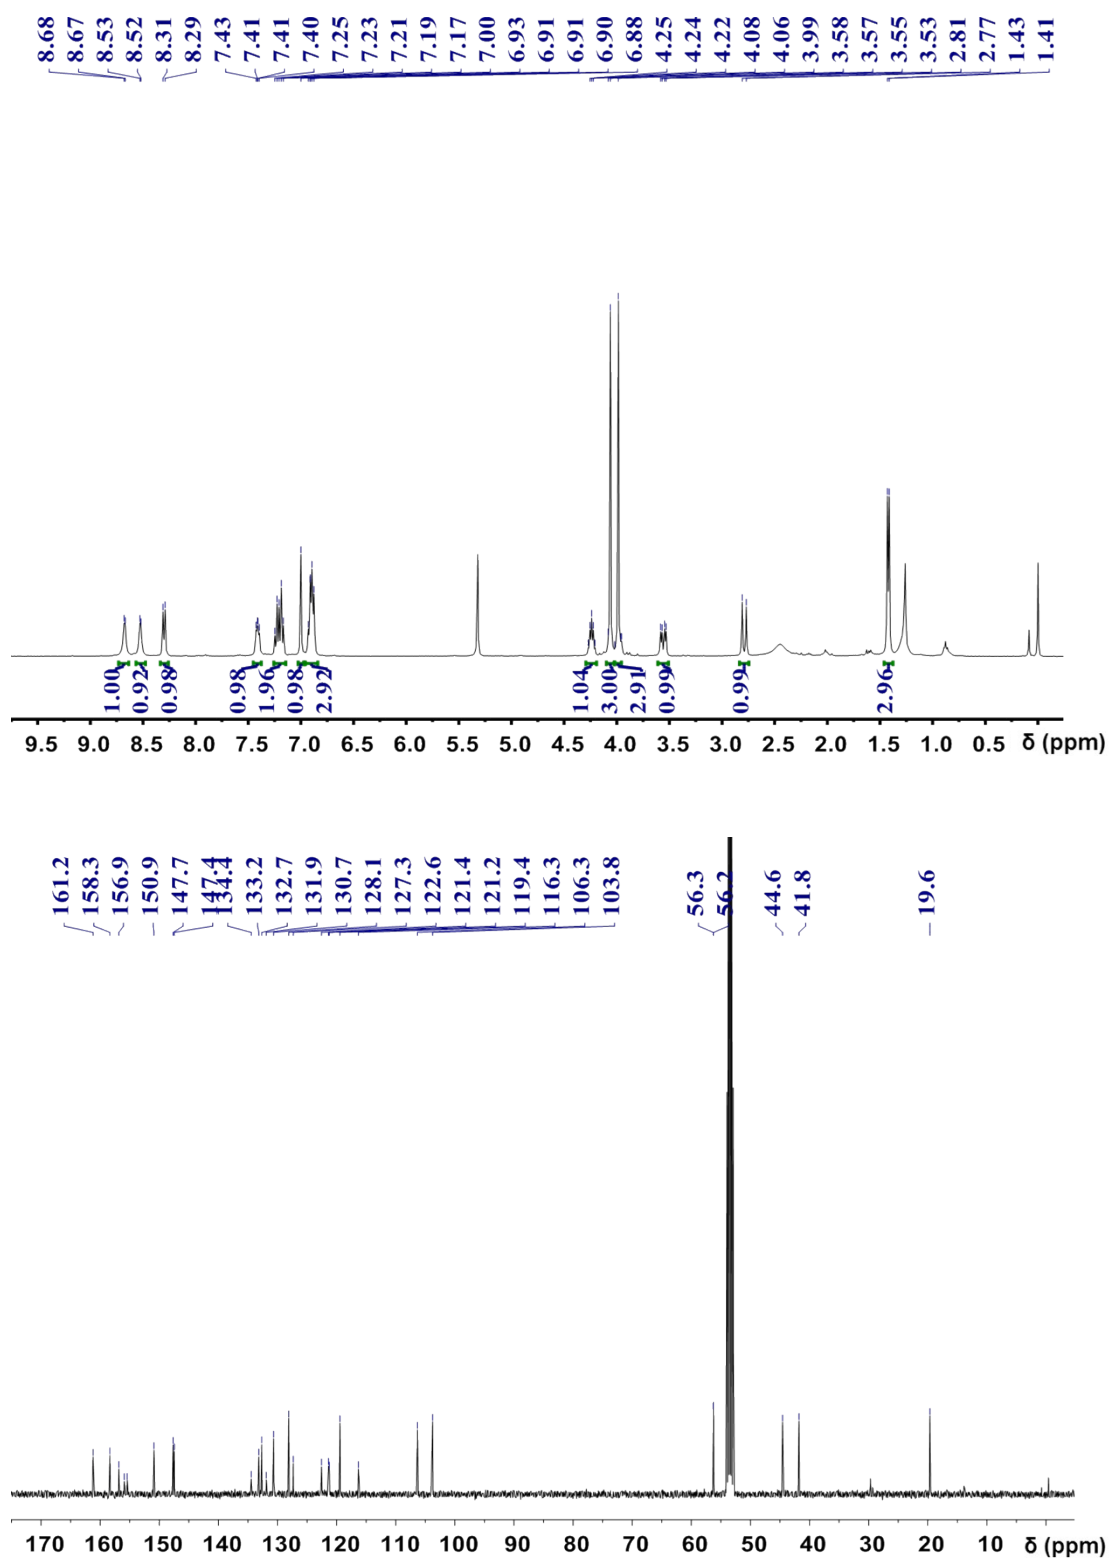

**Figure S7.**  $^1\text{H}$  NMR (400 MHz) (top) and  $^{13}\text{C}$  NMR (100 MHz) (bottom) spectra of **L** measured in  $\text{CD}_2\text{Cl}_2$  at 298 K.



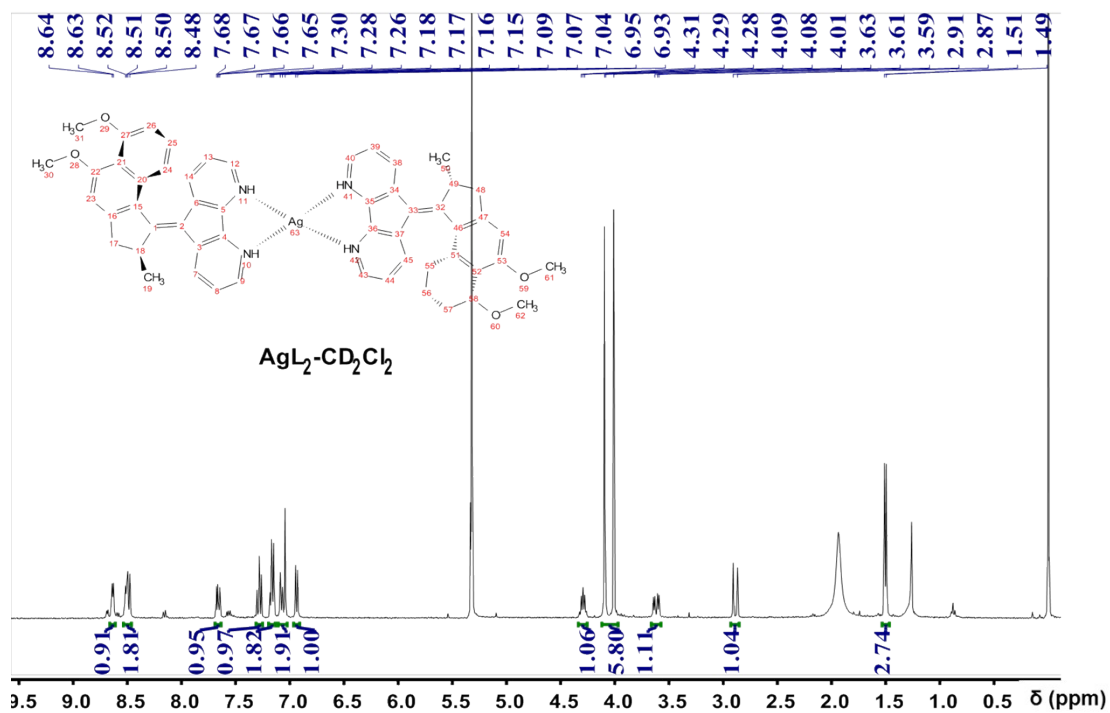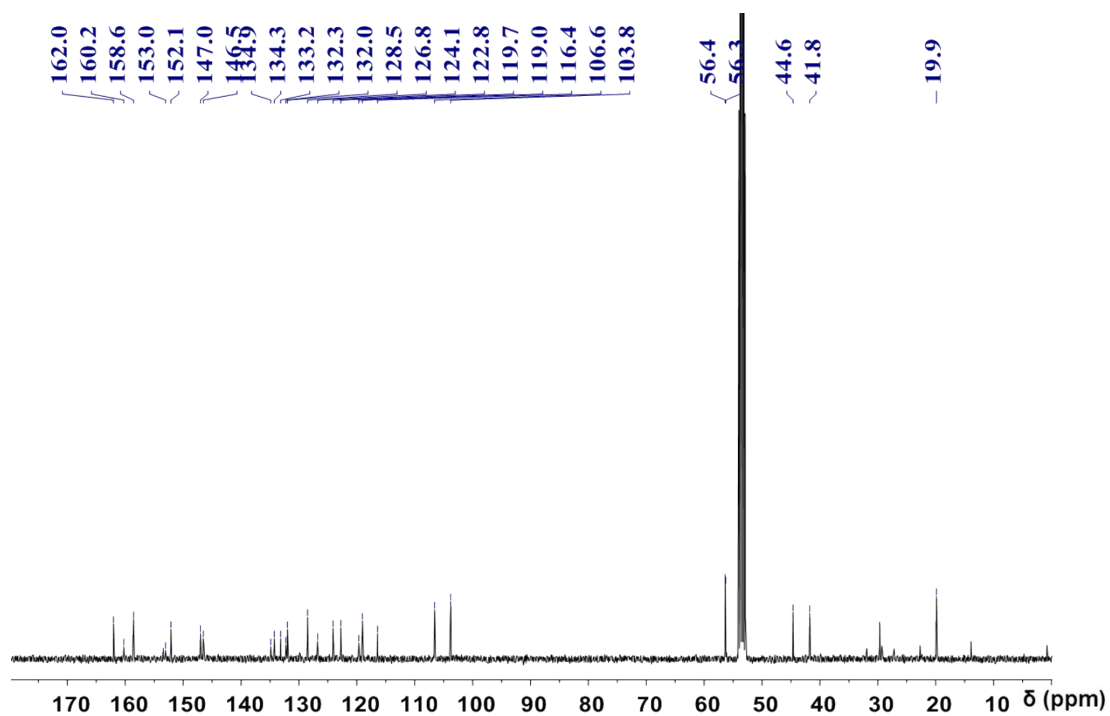

**Figure S8.** <sup>1</sup>H NMR (400 MHz) (top) and <sup>13</sup>C NMR (100 MHz) (bottom) spectra of **AgL<sub>2</sub>** measured in CD<sub>2</sub>Cl<sub>2</sub> at 298 K.

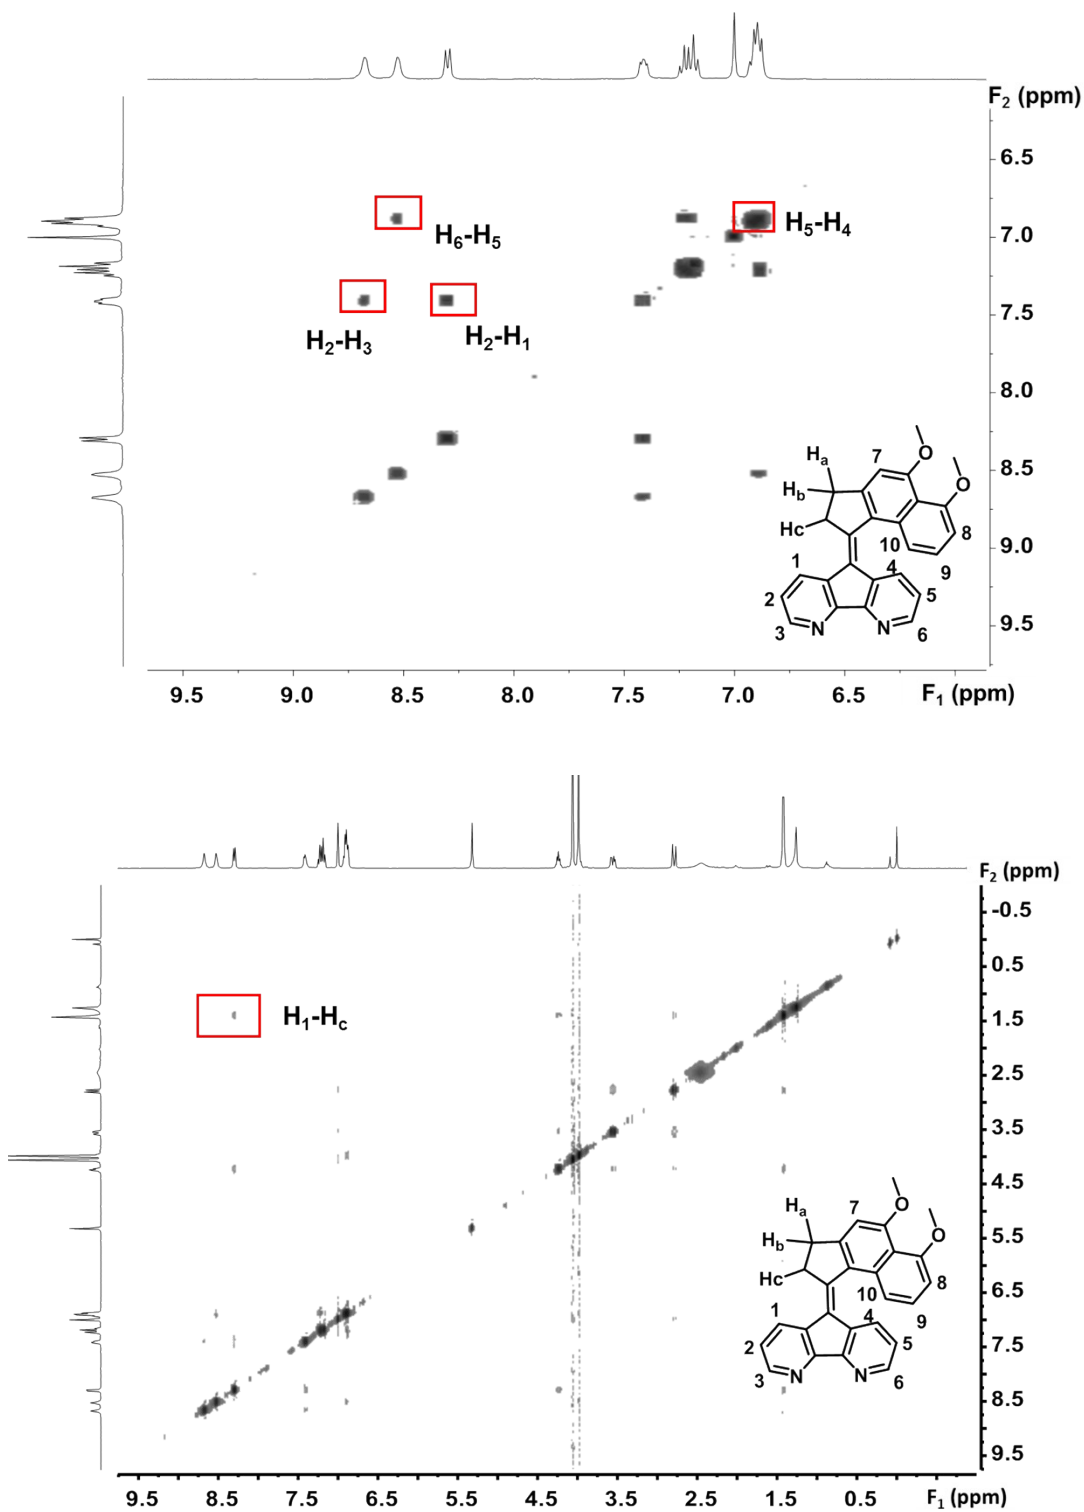

**Figure S9.** COSY (top) and NOESY (bottom) spectrum of **L** measured in  $\text{CD}_2\text{Cl}_2$  at 298 K.

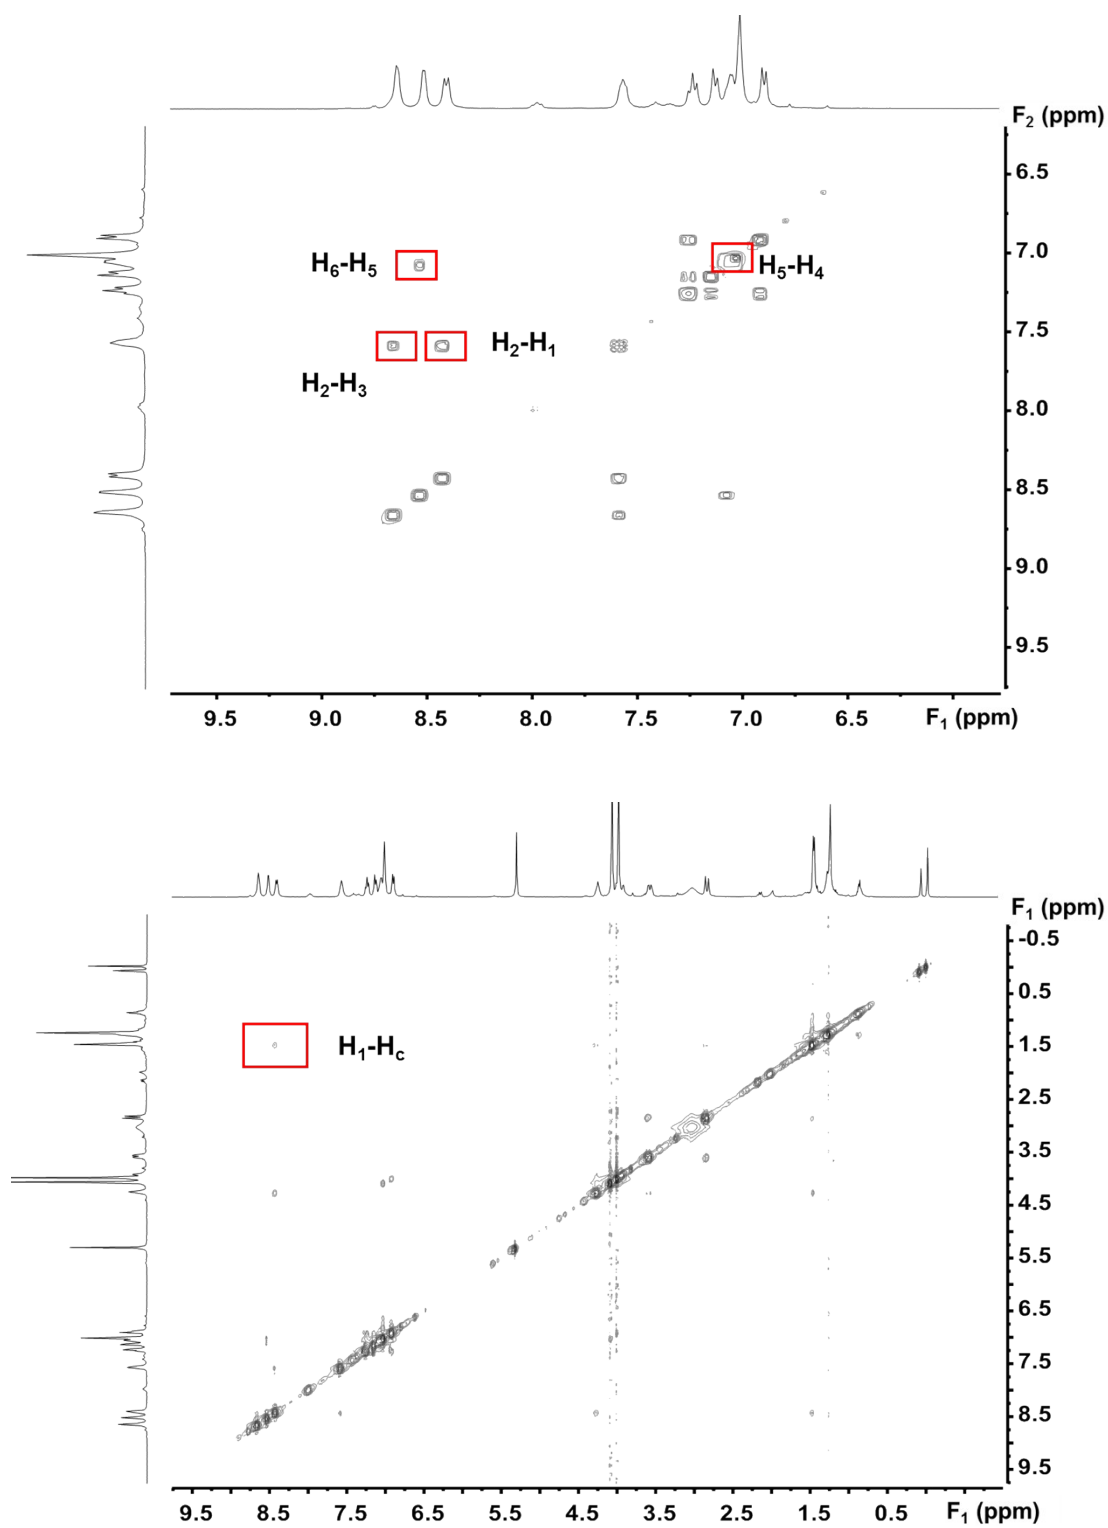

**Figure S10.** COSY (top) and NOESY (bottom) spectrum of  $\text{AgL}_2$  measured in  $\text{CD}_2\text{Cl}_2$  at 298 K.

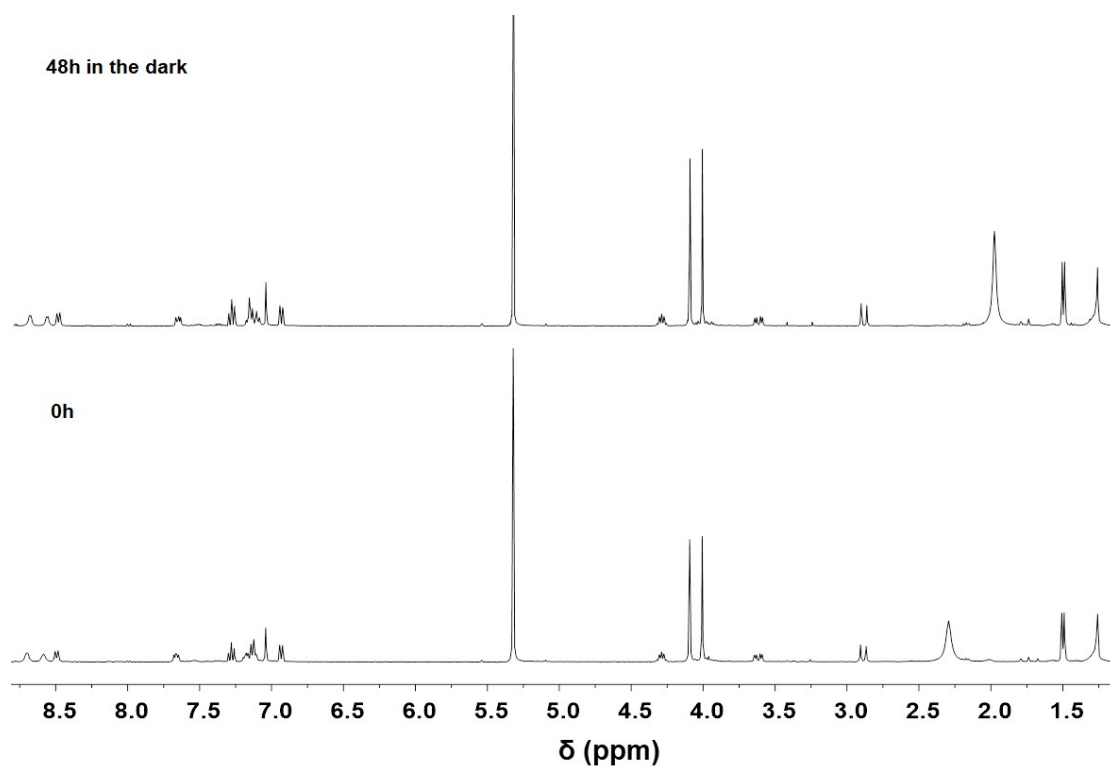

**Figure S11.** Stability of  $\text{AgL}_2$  in  $\text{CD}_2\text{Cl}_2$  solution monitored by  $^1\text{H}$  NMR (400 MHz) at 298 K

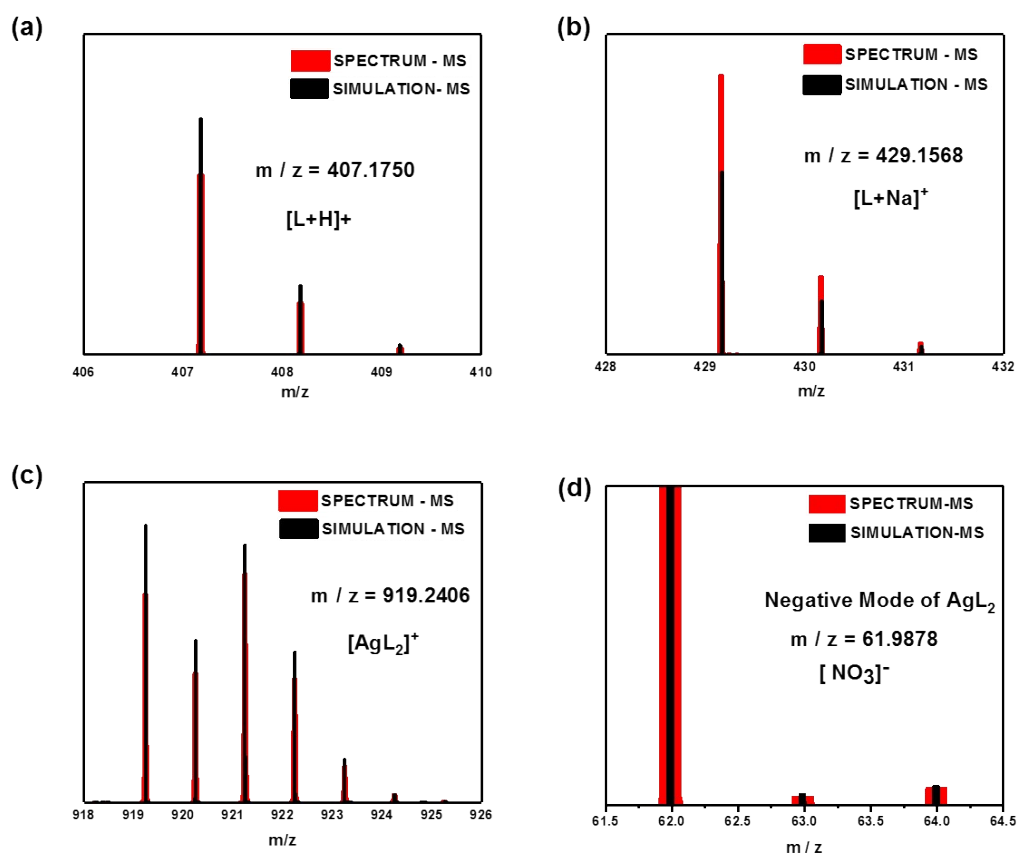

**Figure S12.** High resolution mass spectrum of (a, b)  $\text{L}$  and (c, d)  $\text{AgL}_2$ .

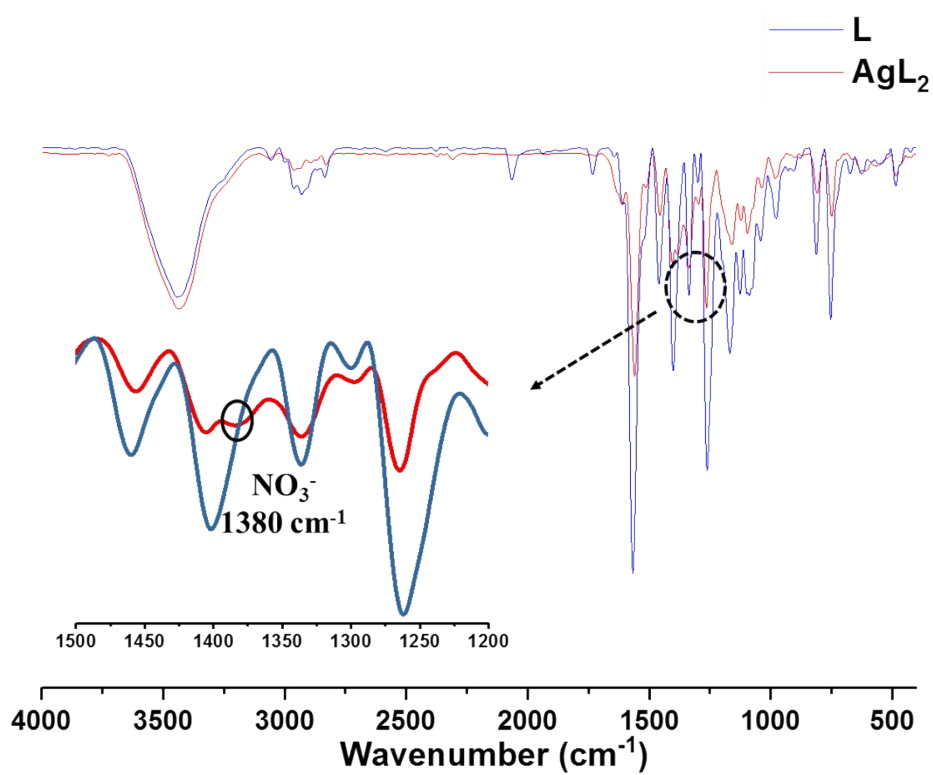

**Figure S13.** FT-IR spectrum of L and AgL<sub>2</sub>.

## 6 Crystal data of L and AgL<sub>2</sub>

**Table S6.** Crystal parameters of L and AgL<sub>2</sub>

| Complex                                                         | L                                                             | AgL <sub>2</sub>                                                              |
|-----------------------------------------------------------------|---------------------------------------------------------------|-------------------------------------------------------------------------------|
| Empirical formula                                               | C <sub>54</sub> H <sub>44</sub> N <sub>4</sub> O <sub>4</sub> | C <sub>54</sub> H <sub>44</sub> Ag <sub>1</sub> N <sub>4</sub> O <sub>4</sub> |
| Formula weight                                                  | 812.93                                                        | 922.82                                                                        |
| Temperature / K                                                 | 293(2)                                                        | 293(2)                                                                        |
| Crystal system                                                  | triclinic                                                     | monoclinic                                                                    |
| Space group                                                     | <i>P</i> -1                                                   | <i>C</i> 2/ <i>c</i>                                                          |
| <i>a</i> / Å                                                    | 10.8590(2)                                                    | 38.1630(11)                                                                   |
| <i>b</i> / Å                                                    | 11.9981(2)                                                    | 17.6194(7)                                                                    |
| <i>c</i> / Å                                                    | 16.6267(2)                                                    | 7.3988(3)                                                                     |
| $\alpha$ / °                                                    | 76.3770(10)                                                   | 90                                                                            |
| $\beta$ / °                                                     | 89.7630(10)                                                   | 92.801(3)                                                                     |
| $\gamma$ / °                                                    | 76.2500(10)                                                   | 90                                                                            |
| <i>V</i> / Å <sup>3</sup>                                       | 2041.89(6)                                                    | 4969.1(3)                                                                     |
| <i>Z</i>                                                        | 2                                                             | 4                                                                             |
| <i>F</i> (000)                                                  | 856.0                                                         | 1908.0                                                                        |
| <i>D</i> <sub>c</sub> / g cm <sup>-3</sup>                      | 1.322                                                         | 1.234                                                                         |
| $\mu$ / mm <sup>-1</sup>                                        | 0.665                                                         | 3.622                                                                         |
| Reflns coll.                                                    | 18429                                                         | 15454                                                                         |
| Unique reflns                                                   | 7281                                                          | 4418                                                                          |
| <i>R</i> <sub>int</sub>                                         | 0.0255                                                        | 0.0431                                                                        |
| <sup>a</sup> <i>R</i> <sub>1</sub> [ <i>I</i> ≥ 2σ( <i>I</i> )] | 0.0409                                                        | 0.0421                                                                        |
| <sup>b</sup> <i>WR</i> <sub>2</sub> (all data)                  | 0.1164                                                        | 0.1122                                                                        |
| GOF                                                             | 1.065                                                         | 1.047                                                                         |
| CCDC                                                            | 2015771                                                       | 2076183                                                                       |

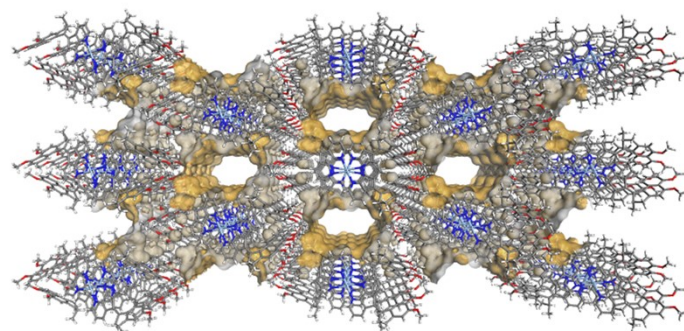

The Volume of the pore:  $13 \times 5.6 \text{ \AA}$   
 $\text{NO}_3^-: \sim 2.4 \times 2.3 \text{ \AA}$

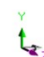

**Figure S14.** Perspective views of the 3D framework with 1D channels in  $\text{AgL}_2$ . The anion  $\text{NO}_3^-$  molecules may occupy the channels as the pore shows larger volume than  $\text{NO}_3^-$ .

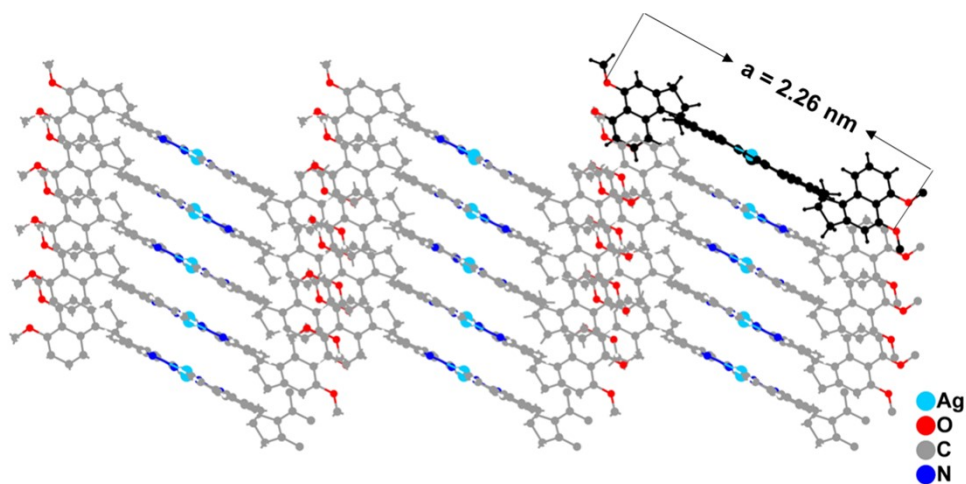

**Figure S15.** Packing mode of crystal structure in  $\text{AgL}_2$  viewed in  $b$  direction.

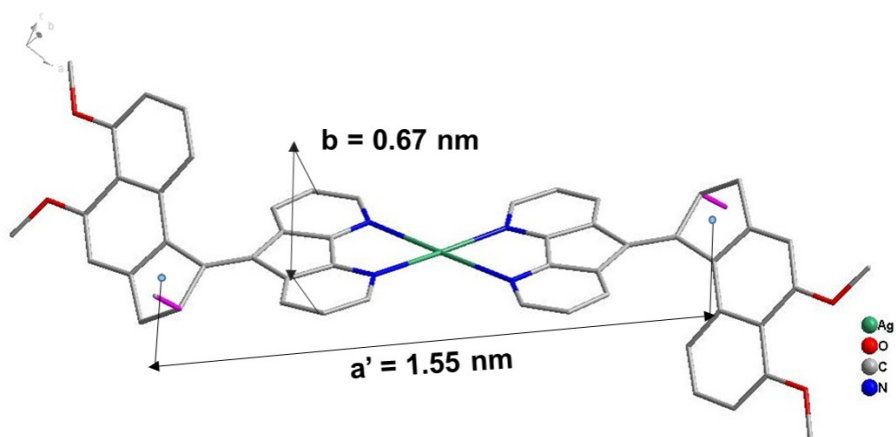

**Figure S16.** The width ( $b$ ) and the length ( $a'$ ) in crystal structure of  $\text{AgL}_2$ .

## 7 DFT calculation

The DFT calculations were carried out using the Gaussian 16 program<sup>S4</sup>. The ground state geometries of **L** and **AgL<sub>2</sub>** were optimized using the B3LYP functional, and the LANL2DZ basis set for Ag atom, the 6-31G(d,p) basis set for lighter atoms. In addition, the relative free energies ( $\Delta G$ ) of the stable and unstable isomers, as well as the transition states (TS) for THI were also calculated with the same method.

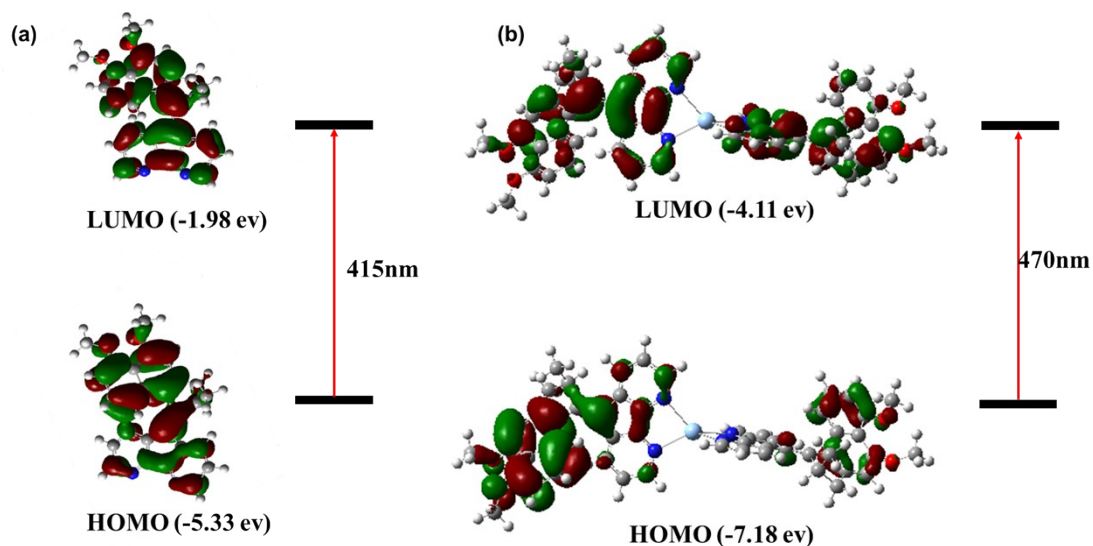

**Figure S17.** Structures and calculated (TD-DFT, B3LYP, 6-31G (d, p)) frontier orbitals of (a) **L**; (b) **AgL<sub>2</sub>**.

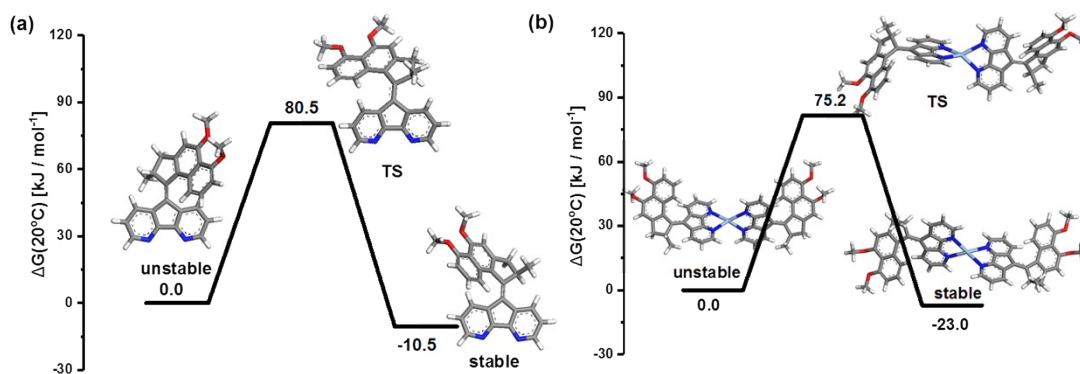

**Figure S18.** Energy optimization of stable, unstable, transition state (TS) on (a) **L** and (b) **AgL<sub>2</sub>**.



**Table S7.** Cartesian coordinates of B3LYP optimized **stable-L**.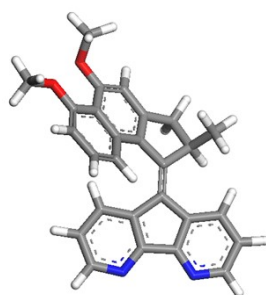

| <b>Stable-L</b> |             |             |             |
|-----------------|-------------|-------------|-------------|
| Atom            | X           | Y           | Z           |
| C               | -4.01264000 | -1.75491500 | 0.68741100  |
| C               | -3.35046800 | -0.61708200 | 0.21848600  |
| C               | -4.13388900 | 0.55554700  | 0.04860900  |
| N               | -5.44419200 | 0.65593900  | 0.27131000  |
| C               | -6.05214100 | -0.46014600 | 0.69358100  |
| C               | -5.38721100 | -1.66942200 | 0.91690100  |
| C               | -1.93007900 | -0.30599600 | -0.08145800 |
| C               | -0.95764800 | 1.95118300  | -1.05388500 |
| C               | -1.33793400 | 3.24113500  | -1.42679800 |
| C               | -2.66179200 | 3.65399600  | -1.24432400 |
| N               | -3.62839400 | 2.86291400  | -0.76173300 |
| C               | -3.25033200 | 1.63208400  | -0.41522000 |
| C               | -1.93003100 | 1.11891300  | -0.49311800 |
| C               | 0.89004500  | 1.04690400  | 1.26907100  |
| C               | 2.50327000  | -2.04359200 | -1.16281600 |
| C               | 3.32520700  | -1.01112700 | -0.74239800 |
| C               | 2.81511400  | 0.06030300  | 0.06587500  |
| C               | 1.13956400  | -2.02487400 | -0.85704300 |
| C               | 0.56668600  | -0.94854700 | -0.18318600 |
| C               | 1.40329100  | 0.07318200  | 0.37365200  |
| C               | 3.62866600  | 1.11615700  | 0.61457100  |
| C               | 3.07614900  | 2.06841900  | 1.45388000  |
| C               | 1.71042300  | 2.01420700  | 1.79459400  |
| C               | 0.10431800  | -3.08145300 | -1.14880900 |
| C               | -0.88308300 | -1.18939600 | -0.06607300 |
| C               | -1.04672700 | -2.70973000 | -0.16770500 |
| C               | -0.86792600 | -3.43108100 | 1.18208500  |
| H               | -3.49756800 | -2.68662300 | 0.88308700  |
| H               | -7.12352900 | -0.38514200 | 0.87002400  |
| H               | -5.93977400 | -2.53340000 | 1.27263000  |
| H               | 0.05975100  | 1.61826100  | -1.21024500 |
| H               | -0.61328400 | 3.92345400  | -1.85996200 |
| H               | -2.96122200 | 4.66448100  | -1.51659900 |

|   |             |             |             |
|---|-------------|-------------|-------------|
| H | -0.15652400 | 1.00957800  | 1.54043900  |
| H | 2.94493900  | -2.85048300 | -1.73938800 |
| H | 3.69176000  | 2.85347000  | 1.87294600  |
| H | 1.30922900  | 2.75135700  | 2.48361600  |
| H | 0.48376100  | -4.09768300 | -0.99591400 |
| H | -0.24577900 | -3.01623600 | -2.18746300 |
| H | -2.01603000 | -2.96927000 | -0.59892700 |
| H | 0.12886300  | -3.23997900 | 1.59179300  |
| H | -0.98210400 | -4.51321100 | 1.05643300  |
| H | -1.59820200 | -3.09516900 | 1.92366100  |
| O | 4.94964800  | 1.11135600  | 0.28268200  |
| O | 4.63512300  | -1.05794900 | -1.15196200 |
| C | 5.52645200  | -1.75959200 | -0.28654900 |
| H | 5.18557500  | -2.78973800 | -0.11942900 |
| H | 6.49392800  | -1.77778700 | -0.79211700 |
| H | 5.63166900  | -1.24740100 | 0.67569300  |
| C | 5.77909800  | 2.15392200  | 0.77279800  |
| H | 6.76995100  | 1.96213700  | 0.35927900  |
| H | 5.43057600  | 3.13789000  | 0.43610500  |
| H | 5.83565900  | 2.14827100  | 1.86875800  |

Sum of electronic and thermal Free Energies = -1301.708442

**Table S8.** Cartesian coordinates of B3LYP optimized TS-L

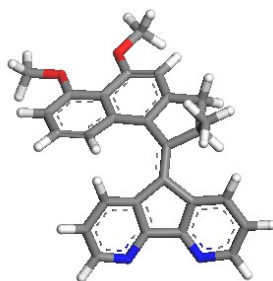

| TS-L |             |             |             |
|------|-------------|-------------|-------------|
| Atom | X           | Y           | Z           |
| C    | -3.93786100 | -1.91805700 | -0.00519100 |
| C    | -3.22467700 | -0.71497300 | -0.06608300 |
| C    | -3.81280900 | 0.30581400  | -0.86928100 |
| N    | -4.88528300 | 0.17589500  | -1.64562900 |
| C    | -5.49126800 | -1.01876400 | -1.62282100 |
| C    | -5.07994500 | -2.06580800 | -0.79950200 |
| C    | -1.94003700 | -0.18183000 | 0.51315000  |
| C    | -1.73939100 | 2.39132000  | 1.17013300  |
| C    | -2.17017700 | 3.66824800  | 0.80172800  |
| C    | -3.01192200 | 3.81511900  | -0.30282500 |
| N    | -3.54729400 | 2.77504800  | -0.95369900 |

|   |             |             |             |
|---|-------------|-------------|-------------|
| C | -3.13384700 | 1.56894200  | -0.56814900 |
| C | -2.11847800 | 1.29711600  | 0.38893200  |
| C | 1.24370700  | 1.51755600  | 1.05725000  |
| C | 2.50053700  | -2.31145700 | -0.16239500 |
| C | 3.34153000  | -1.23659700 | -0.38221800 |
| C | 2.91082700  | 0.09060900  | -0.02052700 |
| C | 1.19287100  | -2.10953400 | 0.29424600  |
| C | 0.65246800  | -0.84986600 | 0.55967700  |
| C | 1.57883900  | 0.26405600  | 0.51317900  |
| C | 3.76391200  | 1.24779200  | -0.10969500 |
| C | 3.35130000  | 2.47479400  | 0.38860500  |
| C | 2.09692500  | 2.59298400  | 1.00281700  |
| C | 0.21449200  | -3.22258800 | 0.48138400  |
| C | -0.83045000 | -0.99506400 | 0.70226900  |
| C | -1.08354100 | -2.50436300 | 0.87712900  |
| C | -1.51556100 | -2.82227200 | 2.32019000  |
| H | -3.67711400 | -2.71747400 | 0.67530600  |
| H | -6.36341900 | -1.12943500 | -2.26414800 |
| H | -5.65518100 | -2.98561100 | -0.75990300 |
| H | -1.18144800 | 2.27242600  | 2.09038200  |
| H | -1.87975000 | 4.53582800  | 1.38572300  |
| H | -3.32182200 | 4.80417500  | -0.63469000 |
| H | 0.30557600  | 1.60146500  | 1.56355200  |
| H | 2.82352700  | -3.32194700 | -0.37804400 |
| H | 3.99955000  | 3.33877400  | 0.32955300  |
| H | 1.80233200  | 3.54355200  | 1.43792600  |
| H | 0.55571500  | -3.92347000 | 1.25424500  |
| H | 0.09677100  | -3.80880100 | -0.43865700 |
| H | -1.86714300 | -2.82601400 | 0.19410800  |
| H | -0.72403300 | -2.54775300 | 3.02616600  |
| H | -1.71435700 | -3.89379000 | 2.43721100  |
| H | -2.41639500 | -2.27017200 | 2.60265200  |
| O | 4.58425700  | -1.38305200 | -0.89770100 |
| O | 4.98326300  | 1.07877600  | -0.68819100 |
| C | 5.85839500  | 2.19064500  | -0.77553800 |
| H | 6.75908400  | 1.81844000  | -1.26572800 |
| H | 5.42848400  | 3.00105800  | -1.37781500 |
| H | 6.12143200  | 2.58126800  | 0.21580000  |
| C | 5.03241100  | -2.68382700 | -1.24839800 |
| H | 4.38925600  | -3.14112100 | -2.01024800 |
| H | 6.03527400  | -2.54891600 | -1.65512300 |
| H | 5.08205800  | -3.34484900 | -0.37424400 |

---

Sum of electronic and thermal Free Energies = -1301.673762

---

**Table S9.** Cartesian coordinates of B3LYP optimized **unstable-L**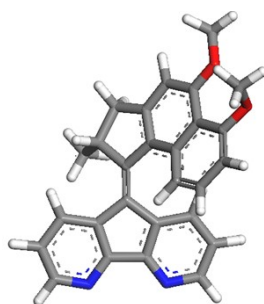

| Unstable-L |             |             |             |
|------------|-------------|-------------|-------------|
| Atom       | X           | Y           | Z           |
| C          | -0.48780100 | 3.24426600  | 0.59604300  |
| C          | 0.76947200  | 1.23748900  | 0.02371300  |
| C          | 0.90014300  | 2.77422300  | 0.07060000  |
| C          | 2.01893200  | 3.32597600  | 0.96670100  |
| H          | 3.13435900  | 2.48576500  | -1.60953900 |
| H          | 6.82858300  | 0.28121200  | -1.65690100 |
| H          | 5.50213300  | 2.26529300  | -2.35019300 |
| H          | 0.02593800  | -1.34939100 | 1.66280100  |
| H          | 0.83141800  | -3.49562900 | 2.64312300  |
| H          | 3.16200500  | -4.24548700 | 2.21660000  |
| H          | 0.31513100  | -1.25581000 | -1.24005900 |
| H          | -3.28609300 | 2.95068500  | 0.86200800  |
| H          | -3.38165200 | -3.42918700 | -1.44513200 |
| H          | -0.93161300 | -3.25147500 | -1.94550600 |
| H          | -0.41091500 | 3.51617400  | 1.65757100  |
| H          | -0.86512800 | 4.13118900  | 0.07425600  |
| H          | 1.02635100  | 3.16082400  | -0.95161500 |
| H          | 1.94588600  | 4.41805600  | 1.01675000  |
| H          | 3.01933600  | 3.07393500  | 0.61803400  |
| H          | 1.91378400  | 2.93552600  | 1.98414000  |
| C          | 3.72664200  | 1.63243200  | -1.29593500 |
| C          | 3.20067900  | 0.63087200  | -0.47446900 |
| C          | 4.03751300  | -0.48404600 | -0.19833200 |
| N          | 5.30206500  | -0.62093700 | -0.60048400 |
| C          | 5.79261200  | 0.38230000  | -1.33868300 |
| C          | 5.04888400  | 1.50547500  | -1.72118600 |
| C          | 1.84600200  | 0.37563100  | 0.05575100  |
| C          | 1.03710000  | -1.69127400 | 1.47694200  |
| C          | 1.49068400  | -2.88774200 | 2.03135400  |
| C          | 2.80652900  | -3.30574300 | 1.79779600  |
| N          | 3.69714400  | -2.60351900 | 1.08666800  |
| C          | 3.25038200  | -1.46108100 | 0.56214800  |
| C          | 1.92735600  | -0.95860200 | 0.68636900  |

|   |             |             |             |
|---|-------------|-------------|-------------|
| C | -0.74398400 | -1.32467600 | -1.03790200 |
| C | -2.77708300 | 2.04586300  | 0.55461100  |
| C | -3.48788300 | 0.88167300  | 0.30552100  |
| C | -2.81797600 | -0.29333900 | -0.20117700 |
| C | -1.38508400 | 2.05710900  | 0.41087200  |
| C | -0.66061100 | 0.92427900  | 0.05219800  |
| C | -1.38455500 | -0.24953600 | -0.37652200 |
| C | -3.50187500 | -1.49170800 | -0.58619500 |
| C | -2.82169000 | -2.53777200 | -1.18174300 |
| C | -1.44584400 | -2.44076700 | -1.43838900 |
| O | -4.84396700 | -1.66929600 | -0.33855200 |
| O | -4.83088700 | 0.80361600  | 0.46823300  |
| C | -5.52783300 | 1.92801900  | 0.98848300  |
| H | -5.14554600 | 2.21484800  | 1.97514300  |
| H | -5.46811400 | 2.78991400  | 0.31247400  |
| H | -6.56751800 | 1.61252400  | 1.08026200  |
| C | -5.71002400 | -1.38140200 | -1.43321400 |
| H | -5.43524900 | -1.96183300 | -2.32351000 |
| H | -6.71535100 | -1.66490400 | -1.11484800 |
| H | -5.69749200 | -0.31310900 | -1.67873200 |

Sum of electronic and thermal Free Energies = -1301.704457

**Table S10.** Cartesian coordinates of B3LYP optimized **stable-AgL<sub>2</sub>**

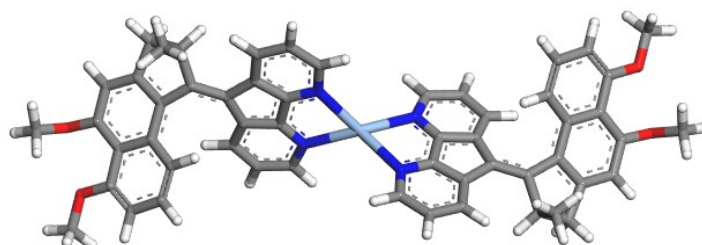

| Stable-AgL <sub>2</sub> |             |             |             |
|-------------------------|-------------|-------------|-------------|
| Atom                    | X           | Y           | Z           |
| Ag                      | 0.00063500  | 0.00917400  | 0.50608700  |
| N                       | -1.61442300 | 1.50141300  | 1.59076500  |
| C                       | -2.81119500 | 1.23857800  | 1.06030200  |
| C                       | -1.57114200 | 2.48100400  | 2.50711800  |
| C                       | -4.02851900 | 1.89452100  | 1.36379500  |
| C                       | -3.06953600 | 0.22589000  | 0.05630400  |
| C                       | -2.71190100 | 3.18680600  | 2.90291900  |
| H                       | -0.59980700 | 2.70243400  | 2.93887400  |
| C                       | -3.95776100 | 2.89597500  | 2.34017800  |
| C                       | -5.11589600 | 1.26734900  | 0.57423700  |
| N                       | -2.13427600 | -0.53584600 | -0.51784900 |

|   |              |             |             |
|---|--------------|-------------|-------------|
| C | -4.45053000  | 0.23009400  | -0.24743100 |
| H | -2.62126900  | 3.96255000  | 3.65587800  |
| H | -4.82988500  | 3.44307700  | 2.67416100  |
| C | -6.43391100  | 1.66296700  | 0.54399200  |
| C | -2.55425600  | -1.36079300 | -1.48991900 |
| C | -4.85363800  | -0.60023500 | -1.30102600 |
| C | -7.59805600  | 1.01609800  | -0.06513000 |
| C | -6.91005600  | 3.04807700  | 0.98763800  |
| C | -3.88716400  | -1.40326700 | -1.91223800 |
| H | -1.80118400  | -1.99066900 | -1.95371000 |
| H | -5.87660000  | -0.62566400 | -1.65088600 |
| C | -8.47631800  | 2.01352100  | -0.49661900 |
| C | -7.97559500  | -0.36597300 | -0.16245500 |
| C | -7.97416100  | 3.37761900  | -0.10023900 |
| C | -7.54805800  | 3.04010100  | 2.39177300  |
| H | -6.09174600  | 3.77143900  | 0.95687200  |
| H | -4.16412300  | -2.06492100 | -2.72615600 |
| C | -9.63804600  | 1.69605100  | -1.20149500 |
| C | -7.24213900  | -1.38838600 | 0.48948100  |
| C | -9.18290200  | -0.70124800 | -0.88041800 |
| H | -8.77332300  | 4.02919000  | 0.26813700  |
| H | -7.50397700  | 3.88793300  | -0.95072200 |
| H | -8.42143000  | 2.38128800  | 2.41358900  |
| H | -7.87513300  | 4.04831500  | 2.66547200  |
| H | -6.85230900  | 2.68730500  | 3.15866500  |
| C | -9.97182700  | 0.36813400  | -1.42879800 |
| H | -10.28754200 | 2.46739300  | -1.60312000 |
| C | -7.63786100  | -2.70239100 | 0.39204200  |
| H | -6.37891400  | -1.12099400 | 1.08507800  |
| C | -9.54525700  | -2.09412200 | -0.97621000 |
| O | -11.06141100 | 0.12699400  | -2.21474400 |
| C | -8.77267500  | -3.06462500 | -0.35543500 |
| H | -7.07543000  | -3.47780600 | 0.90379500  |
| O | -10.67164000 | -2.39104500 | -1.66923200 |
| C | -12.33085300 | 0.11735300  | -1.55529100 |
| H | -9.05106200  | -4.10835400 | -0.41733500 |
| C | -11.06033400 | -3.75363800 | -1.80228400 |
| H | -12.49908200 | 1.05422300  | -1.00973900 |
| H | -13.08086200 | 0.01641200  | -2.34108600 |
| H | -12.40808100 | -0.73055000 | -0.86685100 |
| H | -11.96685700 | -3.74248000 | -2.40784800 |
| H | -10.28952200 | -4.34155300 | -2.31438100 |
| H | -11.27792900 | -4.20835900 | -0.82821200 |
| N | 1.61176000   | -1.48577500 | 1.59739000  |

|   |             |             |             |
|---|-------------|-------------|-------------|
| C | 2.80904500  | -1.22763100 | 1.06584200  |
| C | 1.56627500  | -2.46245000 | 2.51670500  |
| C | 4.02480600  | -1.88565800 | 1.37102000  |
| C | 3.06968900  | -0.21860300 | 0.05867000  |
| C | 2.70535000  | -3.16996500 | 2.91437300  |
| H | 0.59450100  | -2.68010100 | 2.94942300  |
| C | 3.95179400  | -2.88398100 | 2.35046100  |
| C | 5.11354700  | -1.26356000 | 0.57930000  |
| N | 2.13617900  | 0.54371500  | -0.51768700 |
| C | 4.45059000  | -0.22709100 | -0.24532700 |
| H | 2.61294100  | -3.94318400 | 3.66971300  |
| H | 4.82262500  | -3.43227400 | 2.68586900  |
| C | 6.43056700  | -1.66253900 | 0.54991800  |
| C | 2.55797900  | 1.36473200  | -1.49231300 |
| C | 4.85554700  | 0.59916900  | -1.30142400 |
| C | 7.59620100  | -1.02041200 | -0.06139100 |
| C | 6.90331000  | -3.04752200 | 0.99754500  |
| C | 3.89093600  | 1.40272500  | -1.91488900 |
| H | 1.80638000  | 1.99498700  | -1.95795500 |
| H | 5.87851800  | 0.62110200  | -1.65149300 |
| C | 8.47184900  | -2.02133000 | -0.49009800 |
| C | 7.97720500  | 0.36040500  | -0.16289600 |
| C | 7.96633800  | -3.38297700 | -0.08958500 |
| C | 7.54165400  | -3.03702600 | 2.40150800  |
| H | 6.08317100  | -3.76890000 | 0.96908200  |
| H | 4.16936000  | 2.06130700  | -2.73079400 |
| C | 9.63430000  | -1.70887100 | -1.19601500 |
| C | 7.24645100  | 1.38659900  | 0.48613700  |
| C | 9.18523200  | 0.69051600  | -0.88205800 |
| H | 8.76393200  | -4.03547300 | 0.28054200  |
| H | 7.49466300  | -3.89461300 | -0.93844700 |
| H | 8.41673400  | -2.38041600 | 2.42117600  |
| H | 7.86617900  | -4.04526800 | 2.67812100  |
| H | 6.84699400  | -2.68015500 | 3.16750100  |
| C | 9.97145800  | -0.38248300 | -1.42723300 |
| H | 10.28186100 | -2.48301000 | -1.59537300 |
| C | 7.64538500  | 2.69932300  | 0.38463500  |
| H | 6.38272800  | 1.12313800  | 1.08276000  |
| C | 9.55090300  | 2.08221500  | -0.98226600 |
| O | 11.06174300 | -0.14656300 | -2.21380500 |
| C | 8.78086400  | 3.05649800  | -0.36426600 |
| H | 7.08500700  | 3.47766300  | 0.89419300  |
| O | 10.67773400 | 2.37427900  | -1.67662400 |
| C | 12.33101400 | -0.13712100 | -1.55400000 |

|                                                            |             |             |             |
|------------------------------------------------------------|-------------|-------------|-------------|
| H                                                          | 9.06175900  | 4.09935400  | -0.42948100 |
| C                                                          | 11.06960700 | 3.73552400  | -1.81408800 |
| H                                                          | 12.49727600 | -1.07251100 | -1.00531100 |
| H                                                          | 13.08143500 | -0.04021600 | -2.33990800 |
| H                                                          | 12.40968200 | 0.71290000  | -0.86834900 |
| H                                                          | 11.97586700 | 3.72031700  | -2.41995800 |
| H                                                          | 10.29999000 | 4.32365700  | -2.32772900 |
| H                                                          | 11.28865400 | 4.19277200  | -0.84152600 |
| Sum of electronic and thermal Free Energies = -2749.043464 |             |             |             |

**Table S11.** Cartesian coordinates of B3LYP optimized TS-AgL<sub>2</sub>

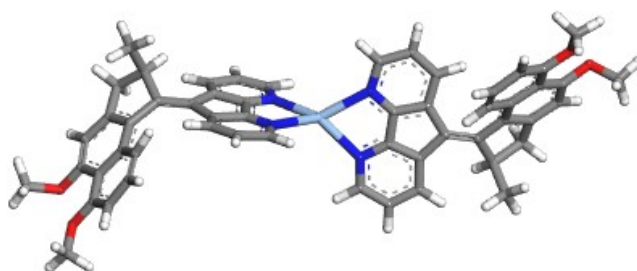

| TS-AgL <sub>2</sub> |            |             |             |
|---------------------|------------|-------------|-------------|
| Atom                | X          | Y           | Z           |
| Ag                  | 0.01720000 | 0.10504300  | -0.42819400 |
| N                   | 1.46999000 | -1.87474300 | -0.50343600 |
| C                   | 2.73109700 | -1.43735600 | -0.47698700 |
| C                   | 1.30239300 | -3.20281600 | -0.59936900 |
| C                   | 3.89980200 | -2.23306100 | -0.54767900 |
| C                   | 3.12430800 | -0.04569200 | -0.38193900 |
| C                   | 2.38104800 | -4.09145200 | -0.65595700 |
| H                   | 0.27898700 | -3.56459700 | -0.62641500 |
| C                   | 3.69510800 | -3.61644400 | -0.62297800 |
| C                   | 5.08480600 | -1.34636000 | -0.45173300 |
| N                   | 2.27754300 | 0.98748500  | -0.37195100 |
| C                   | 4.53630000 | 0.02694100  | -0.36566200 |
| H                   | 2.18779800 | -5.15688900 | -0.72271500 |
| H                   | 4.51413300 | -4.32357500 | -0.65063700 |
| C                   | 6.40221300 | -1.73364600 | -0.54434400 |
| C                   | 2.83193400 | 2.20997900  | -0.36449500 |
| C                   | 5.08906900 | 1.31310900  | -0.41195500 |
| C                   | 7.62831500 | -0.97001300 | -0.30184400 |
| C                   | 6.85125900 | -3.05802600 | -1.16594600 |
| C                   | 4.21663600 | 2.40461500  | -0.40207500 |



|   |             |             |             |
|---|-------------|-------------|-------------|
| H | 2.14957400  | 3.05435700  | -0.34545800 |
| H | 6.15691100  | 1.47606300  | -0.46330100 |
| C | 8.61597600  | -1.44176200 | -1.17027100 |
| C | 7.95370500  | 0.01680100  | 0.68923000  |
| C | 8.11225700  | -2.61771400 | -1.96621700 |
| C | 7.21729200  | -4.12066400 | -0.10983900 |
| H | 6.08699900  | -3.45311200 | -1.83940800 |
| H | 4.60888700  | 3.41574600  | -0.42881900 |
| C | 9.87235100  | -0.83732100 | -1.23010100 |
| C | 7.06605900  | 0.33328000  | 1.74769200  |
| C | 9.25648500  | 0.63803700  | 0.64096400  |
| H | 8.85848500  | -3.41368600 | -2.05838000 |
| H | 7.83148800  | -2.31523600 | -2.98331400 |
| H | 8.03989200  | -3.76898200 | 0.52020600  |
| H | 7.53465400  | -5.04749900 | -0.59836100 |
| H | 6.37587500  | -4.35333100 | 0.54937000  |
| C | 10.18133000 | 0.20948000  | -0.37275600 |
| H | 10.61955300 | -1.15042600 | -1.95244700 |
| C | 7.41229700  | 1.27130100  | 2.69256400  |
| H | 6.12057600  | -0.18880300 | 1.81750100  |
| C | 9.56611200  | 1.63277900  | 1.63855700  |
| O | 11.38544500 | 0.82645300  | -0.55384200 |
| C | 8.64820700  | 1.93971100  | 2.63216700  |
| H | 6.72981900  | 1.49972000  | 3.50591500  |
| O | 10.78673200 | 2.21787000  | 1.56652100  |
| C | 12.50894900 | 0.23134200  | 0.10176900  |
| H | 8.88496500  | 2.67741000  | 3.38744800  |
| C | 11.13032600 | 3.21591800  | 2.52103000  |
| H | 12.61628900 | -0.82377100 | -0.17912800 |
| H | 13.38606500 | 0.78632700  | -0.23417500 |
| H | 12.41825500 | 0.31705500  | 1.18956800  |
| H | 12.13292200 | 3.54802300  | 2.25058000  |
| H | 10.44160800 | 4.06775100  | 2.47506100  |
| H | 11.14247600 | 2.81221600  | 3.54076000  |
| N | -1.82393300 | 0.66890700  | -1.91261200 |
| C | -2.90006200 | 0.92988000  | -1.16043800 |
| C | -1.97763100 | 0.77307600  | -3.23746600 |
| C | -4.17880400 | 1.32899100  | -1.61826600 |
| C | -2.94431000 | 0.80228900  | 0.27337600  |
| C | -3.21334800 | 1.08502800  | -3.81684700 |
| H | -1.10283500 | 0.57970800  | -3.85087100 |
| C | -4.32656300 | 1.33962100  | -3.01716900 |
| C | -5.11003600 | 1.41089600  | -0.45172300 |
| N | -1.88015100 | 0.51991500  | 1.03333800  |

---

|   |              |             |             |
|---|--------------|-------------|-------------|
| C | -4.26348900  | 1.08550400  | 0.72200800  |
| H | -3.30288400  | 1.11231800  | -4.89768900 |
| H | -5.27649400  | 1.52235600  | -3.50266800 |
| C | -6.47363200  | 1.65448200  | -0.65019200 |
| C | -2.06409000  | 0.54107200  | 2.35886000  |
| C | -4.38383000  | 1.20311000  | 2.11538400  |
| C | -7.73042400  | 1.00342100  | -0.23133700 |
| C | -6.89484200  | 2.63563300  | -1.75384400 |
| C | -3.28895200  | 0.90535800  | 2.92609400  |
| H | -1.20739600  | 0.29372000  | 2.97846400  |
| H | -5.28915800  | 1.54082700  | 2.59112200  |
| C | -8.57896500  | 1.02505400  | -1.35257400 |
| C | -8.15540500  | 0.24708900  | 0.92055200  |
| C | -8.09392300  | 1.95541100  | -2.42972700 |
| C | -7.28594600  | 3.97286700  | -1.08012700 |
| H | -6.08933400  | 2.86571600  | -2.44420600 |
| H | -3.37831700  | 0.97289200  | 4.00515000  |
| C | -9.68031300  | 0.17243700  | -1.45735700 |
| C | -7.59785400  | 0.47054200  | 2.19452000  |
| C | -9.25635600  | -0.67825300 | 0.79894600  |
| H | -8.87259600  | 2.65976700  | -2.74304900 |
| H | -7.79479300  | 1.39323200  | -3.32427100 |
| H | -8.13824800  | 3.84605900  | -0.40597000 |
| H | -7.55925500  | 4.70430100  | -1.84743400 |
| H | -6.45046300  | 4.38100900  | -0.50408700 |
| C | -9.98479000  | -0.71383000 | -0.43892200 |
| H | -10.27602700 | 0.14292500  | -2.36428100 |
| C | -7.98655700  | -0.26913700 | 3.28855200  |
| H | -6.92529200  | 1.30264600  | 2.30773500  |
| C | -9.60386900  | -1.47194900 | 1.95030900  |
| O | -10.97889500 | -1.61790800 | -0.67105400 |
| C | -8.95873400  | -1.27365600 | 3.16366000  |
| H | -7.55245500  | -0.07083600 | 4.26412100  |
| O | -10.59602700 | -2.38135200 | 1.79241700  |
| C | -12.31182300 | -1.18554500 | -0.38092800 |
| H | -9.23194500  | -1.85740300 | 4.03263400  |
| C | -10.96484800 | -3.19897400 | 2.89778100  |
| H | -12.55111700 | -0.25954500 | -0.91823000 |
| H | -12.97131100 | -1.98420600 | -0.72329100 |
| H | -12.44989500 | -1.03523400 | 0.69476900  |
| H | -11.75095900 | -3.85671300 | 2.52635900  |
| H | -10.12014000 | -3.80445100 | 3.24666700  |
| H | -11.35328100 | -2.60062400 | 3.73085000  |

---

Sum of electronic and thermal Free Energies = -2749.006061

---

Table S12. Cartesian coordinates of B3LYP optimized **unstable-AgL<sub>2</sub>**

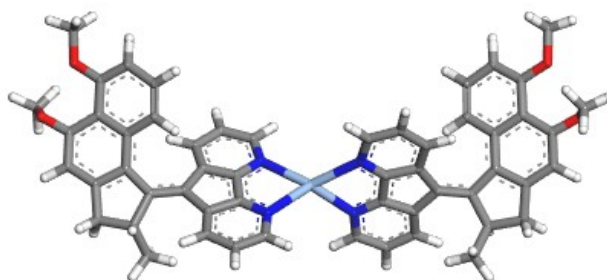

| <b>Unstable-AgL<sub>2</sub></b> |             |             |             |
|---------------------------------|-------------|-------------|-------------|
| Atom                            | X           | Y           | Z           |
| Ag                              | 0.00008800  | -1.03089100 | 0.00063200  |
| N                               | 1.78903200  | -2.18130900 | -1.24906100 |
| C                               | 2.94294700  | -1.69439700 | -0.78396500 |
| C                               | 1.88121700  | -3.13092400 | -2.19172900 |
| C                               | 4.24275700  | -2.09860800 | -1.17591600 |
| C                               | 3.06976900  | -0.63705000 | 0.19627100  |
| C                               | 3.11151400  | -3.57759200 | -2.69172000 |
| H                               | 0.94720400  | -3.53807100 | -2.56711800 |
| C                               | 4.30837300  | -3.05793800 | -2.19520600 |
| C                               | 5.23552300  | -1.26174100 | -0.47421300 |
| N                               | 2.05255800  | -0.06247000 | 0.84569200  |
| C                               | 4.44500900  | -0.34989500 | 0.37422300  |
| H                               | 3.12402800  | -4.33029900 | -3.47292100 |
| H                               | 5.25340300  | -3.39887200 | -2.60359100 |
| C                               | 6.61564100  | -1.37977600 | -0.54482700 |
| C                               | 2.37811800  | 0.86154600  | 1.76269100  |
| C                               | 4.75970100  | 0.58650200  | 1.36798100  |
| C                               | 7.63309900  | -0.36701700 | -0.30737800 |
| C                               | 7.33085400  | -2.72164100 | -0.79308300 |
| C                               | 3.70675200  | 1.19439500  | 2.05452600  |
| H                               | 1.55583700  | 1.33880600  | 2.28704100  |
| H                               | 5.78473600  | 0.83840500  | 1.60981300  |
| C                               | 8.87277200  | -0.98766600 | -0.11320900 |
| C                               | 7.57813800  | 1.07490100  | -0.40088100 |
| C                               | 8.78365800  | -2.47154000 | -0.29870800 |
| C                               | 6.72135100  | -3.93656000 | -0.07448500 |
| H                               | 7.36265900  | -2.91481700 | -1.87519100 |
| H                               | 3.90989000  | 1.93139800  | 2.82436600  |
| C                               | 10.01549500 | -0.25551200 | 0.20587000  |
| C                               | 6.45499100  | 1.75071100  | -0.93358200 |
| C                               | 8.74817900  | 1.83834400  | -0.03184100 |

|   |             |             |             |
|---|-------------|-------------|-------------|
| H | 8.95495200  | -2.99906800 | 0.64850400  |
| H | 9.54408500  | -2.83639800 | -0.99783500 |
| H | 6.67397100  | -3.75335700 | 1.00389500  |
| H | 7.35406000  | -4.81516200 | -0.23731200 |
| H | 5.71574700  | -4.18358900 | -0.41384900 |
| C | 9.95316100  | 1.12637600  | 0.30466600  |
| H | 10.97080900 | -0.73849500 | 0.38325000  |
| C | 6.44768600  | 3.12322400  | -1.05057900 |
| H | 5.61161400  | 1.17647900  | -1.28908300 |
| C | 8.67831500  | 3.27490900  | -0.12524500 |
| O | 11.11595000 | 1.76175500  | 0.62444200  |
| C | 7.54105800  | 3.89339900  | -0.62450300 |
| H | 5.58629000  | 3.62388600  | -1.48276200 |
| O | 9.76735700  | 3.97168800  | 0.28066700  |
| C | 11.28156300 | 2.11920300  | 2.00078100  |
| H | 7.49556300  | 4.97100600  | -0.71061000 |
| C | 9.78808400  | 5.38488600  | 0.11033700  |
| H | 11.22806300 | 1.22969800  | 2.64086200  |
| H | 12.27460100 | 2.56367900  | 2.07973400  |
| H | 10.53034000 | 2.85051200  | 2.31380200  |
| H | 10.76829700 | 5.70854000  | 0.46099900  |
| H | 9.66907300  | 5.66134500  | -0.94358400 |
| H | 9.00871100  | 5.87469300  | 0.70666400  |
| N | -1.78904000 | -2.18122900 | 1.24915900  |
| C | -2.94290700 | -1.69427100 | 0.78402200  |
| C | -1.88127100 | -3.13099700 | 2.19166000  |
| C | -4.24273200 | -2.09855900 | 1.17580800  |
| C | -3.06969400 | -0.63677600 | -0.19608400 |
| C | -3.11160800 | -3.57776700 | 2.69148700  |
| H | -0.94729200 | -3.53820600 | 2.56705600  |
| C | -4.30842400 | -3.05803400 | 2.19496300  |
| C | -5.23549700 | -1.26163800 | 0.47419100  |
| N | -2.05249100 | -0.06213400 | -0.84540000 |
| C | -4.44494700 | -0.34962900 | -0.37403300 |
| H | -3.12415600 | -4.33058300 | 3.47258200  |
| H | -5.25350400 | -3.39897800 | 2.60322300  |
| C | -6.61561000 | -1.37979800 | 0.54459900  |
| C | -2.37803900 | 0.86197700  | -1.76232200 |
| C | -4.75961900 | 0.58688400  | -1.36767000 |
| C | -7.63310100 | -0.36707100 | 0.30710600  |
| C | -7.33077900 | -2.72173600 | 0.79255700  |
| C | -3.70664700 | 1.19486200  | -2.05413700 |
| H | -1.55572600 | 1.33927700  | -2.28659700 |
| H | -5.78463500 | 0.83884500  | -1.60951700 |

---

|   |              |             |             |
|---|--------------|-------------|-------------|
| C | -8.87269400  | -0.98778000 | 0.11261900  |
| C | -7.57825200  | 1.07483700  | 0.40080000  |
| C | -8.78351000  | -2.47167400 | 0.29794000  |
| C | -6.72105300  | -3.93652200 | 0.07392000  |
| H | -7.36277500  | -2.91505600 | 1.87463300  |
| H | -3.90981300  | 1.93192800  | -2.82390800 |
| C | -10.01541300 | -0.25566100 | -0.20655800 |
| C | -6.45525000  | 1.75066500  | 0.93379200  |
| C | -8.74827600  | 1.83824600  | 0.03164000  |
| H | -8.95460100  | -2.99910300 | -0.64936200 |
| H | -9.54403400  | -2.83666700 | 0.99689300  |
| H | -6.67348900  | -3.75318400 | -1.00442900 |
| H | -7.35372600  | -4.81519200 | 0.23652400  |
| H | -5.71549200  | -4.18351900 | 0.41343500  |
| C | -9.95315700  | 1.12624500  | -0.30514400 |
| H | -10.97066900 | -0.73868200 | -0.38414800 |
| C | -6.44806700  | 3.12316100  | 1.05096100  |
| H | -5.61189200  | 1.17644800  | 1.28936500  |
| C | -8.67851300  | 3.27480800  | 0.12518100  |
| O | -11.11593800 | 1.76161200  | -0.62499000 |
| C | -7.54140500  | 3.89331500  | 0.62475000  |
| H | -5.58679600  | 3.62383400  | 1.48338200  |
| O | -9.76750300  | 3.97155400  | -0.28093200 |
| C | -11.28142600 | 2.11911400  | -2.00132600 |
| H | -7.49599200  | 4.97091500  | 0.71098000  |
| C | -9.78837700  | 5.38473200  | -0.11045800 |
| H | -11.22773700 | 1.22965600  | -2.64145700 |
| H | -12.27450700 | 2.56347600  | -2.08038100 |
| H | -10.53024900 | 2.85053300  | -2.31421000 |
| H | -10.76853400 | 5.70834900  | -0.46131200 |
| H | -9.66962900  | 5.66108900  | 0.94352000  |
| H | -9.00890500  | 5.87466200  | -0.70655400 |

---

Sum of electronic and thermal Free Energies = -2749.034720

---

## Reference

- S1. P. J. Davis, L. Harrisa, A. Karim, A. L. Thompson, M. Gilpin, M. G. Moloney, M. J. Pound and C. Thompson. *Tetrahedron Letters*. 2011, **52**, 1553-1556.
- S2. C. Li, H. Yan, L. X. Zhao, G. F. Zhang, Z. Hu, Z. L. Huang and M. Q. Zhu. *Nat. Commun.*, 2014, **5**, 5709.
- S3. S. Wiedbrauk, B. Maerz, E. Samoylova, A. Reiner, F. Trommer, P. Mayer, W. Zinth and H. Dube. Twisted hemithioindigo photoswitches: Solvent polarity determines the

- type of light-induced rotations. *J. Am. Chem. Soc.*, 2016, **138**, 12219-12227.
- S4. M. J. Frisch, G. W. Trucks, H. B. Schlegel, G. E. Scuseria, M. A. Robb, J. R. Cheeseman, G. Scalmani, V. Barone, G. A. Petersson, H. Nakatsuji, X. Li, M. Caricato, A. V. Marenich, J. Bloino, B. G. Janesko, R. Gomperts, B. Mennucci, H. P. Hratchian, J. V. Ortiz, A. F. Izmaylov, J. L. Sonnenberg, D. Williams-Young, F. Ding, F. Lipparini, F. Egidi, J. Goings, B. Peng, A. Petrone, T. Henderson, D. Ranasinghe, V. G. Zakrzewski, J. Gao, N. Rega, G. Zheng, W. Liang, M. Hada, M. Ehara, K. Toyota, R. Fukuda, J. Hasegawa, M. Ishida, T. Nakajima, Y. Honda, O. Kitao, H. Nakai, T. Vreven, K. Throssell, J. A. Montgomery, Jr., J. E. Peralta, F. Ogliaro, M. J. Bearpark, J. J. Heyd, E. N. Brothers, K. N. Kudin, V. N. Staroverov, T. A. Keith, R. Kobayashi, J. Normand, K. Raghavachari, A. P. Rendell, J. C. Burant, S. S. Iyengar, J. Tomasi, M. Cossi, J. M. Millam, M. Klene, C. Adamo, R. Cammi, J. W. Ochterski, R. L. Martin, K. Morokuma, O. Farkas, J. B. Foresman, and D. J. Fox, Gaussian 16, Revision A.03, Gaussian, Inc., Wallingford CT, 2016.
